# Supplementary material for: Multiple Factors Drive Replicating Strand Composition Bias in Bacterial Genomes
Source: Int J Mol Sci. 2015 Sep 23;16(9):23111–26. doi: 10.3390/ijms160923111 (PMC4613354; doi:10.3390/ijms160923111)
Supplement: Supplementary file 1 [file ijms-16-23111-s001.xls]

## Sheet: Table S1
Table S1. The species names and access numbers of 83 obligate intracellular bacteria.
NC	Species Name
NC_013532	Anaplasma_centrale_Israel
NC_012026	Anaplasma_marginale_Florida_uid58577
NC_004842	Anaplasma_marginale_Maries_uid57629
NC_007797	Anaplasma_phagocytophilum_HZ_uid57951
NC_007716	Aster_yellows_witches_broom_phytoplasma_AYWB_uid58297
NC_007984	Baumannia_cicadellinicola_Hc__Homalodisca_coagulata__uid58111
NC_013454	Blattabacterium__Blattella_germanica__Bge
NC_013418	Blattabacterium__Periplaneta_americana__BPLAN
NC_011833	Buchnera_aphidicola_5A__Acyrthosiphon_pisum__uid59285
NC_002528	Buchnera_aphidicola_APS__Acyrthosiphon_pisum__uid57805
NC_004545	Buchnera_aphidicola_Bp__Baizongia_pistaciae__uid57827
NC_008513	Buchnera_aphidicola_Cc__Cinara_cedri__uid58579
NC_004061	Buchnera_aphidicola_Sg__Schizaphis_graminum__uid57913
NC_011834	Buchnera_aphidicola_Tuc7__Acyrthosiphon_pisum__uid59283
NC_005061	Candidatus_Blochmannia_floridanus_uid57999
NC_007292	Candidatus_Blochmannia_pennsylvanicus_BPEN_uid58329
NC_008512	Candidatus_Carsonella_ruddii_uid58773
NC_012751	Candidatus_Hamiltonella_defensa_5AT__Acyrthosiphon_pisum__uid59289
NC_012960	Candidatus_Hodgkinia_cicadicola_Dsem_uid59311
NC_012985	Candidatus_Liberibacter_asiaticus_psy62_uid59227
NC_010544	Candidatus_Phytoplasma_australiense
NC_011047	Candidatus_Phytoplasma_mali_uid59087
NC_005861	Candidatus_Protochlamydia_amoebophila_UWE25_uid58079
NC_014109	Candidatus_Riesia_pediculicola_USDA_uid46841
NC_008610	Candidatus_Ruthia_magnifica_Cm__Calyptogena_magnifica__uid58645
NC_014004	Candidatus_Sulcia_muelleri_DMIN_uid47075
NC_010118	Candidatus_Sulcia_muelleri_GWSS_uid58943
NC_013123	Candidatus_Sulcia_muelleri_SMDSEM_uid59393
NC_009465	Candidatus_Vesicomyosocius_okutanii_HA_uid59427
NC_002620	Chlamydia_muridarum_Nigg_uid57785
NC_010287	Chlamydia_trachomatis_434_Bu
NC_007429	Chlamydia_trachomatis_A_HAR_13_uid58333
NC_012686	Chlamydia_trachomatis_B_Jali20_OT_uid59351
NC_012687	Chlamydia_trachomatis_B_TZ1A828_OT_uid59349
NC_000117	Chlamydia_trachomatis_D_UW_3_CX_uid57637
NC_010280	Chlamydia_trachomatis_L2b_UCH_1_proctitis
NC_004552	Chlamydophila_abortus_S26_3_uid57963
NC_003361	Chlamydophila_caviae_GPIC_uid57783
NC_007899	Chlamydophila_felis_Fe_C_56_uid57971
NC_002179	Chlamydophila_pneumoniae_AR39_uid57809
NC_000922	Chlamydophila_pneumoniae_CWL029_uid57811
NC_002491	Chlamydophila_pneumoniae_J138_uid57829
NC_005043	Chlamydophila_pneumoniae_TW_183_uid57997
NC_011527	Coxiella_burnetii_CbuG_Q212_uid58893
NC_011528	Coxiella_burnetii_CbuK_Q154_uid58895
NC_009727	Coxiella_burnetii_Dugway_5J108_111_uid58629
NC_010117	Coxiella_burnetii_RSA_331_uid58637
NC_002971	Coxiella_burnetii_RSA_493_uid57631
NC_013771	cyanobacterium_UCYN_A_uid43697
NC_007354	Ehrlichia_canis_Jake_uid58071
NC_007799	Ehrlichia_chaffeensis_Arkansas_uid57933
NC_006831	Ehrlichia_ruminantium_Gardel_uid58245
NC_005295	Ehrlichia_ruminantium_Welgevonden_uid58013
NC_006832	Ehrlichia_ruminantium_Welgevonden_uid58243
NC_008011	Lawsonia_intracellularis_PHE_MN1-00
NC_011896	Mycobacterium_leprae_Br4923_uid59293
NC_002677	Mycobacterium_leprae_TN_uid57697
NC_013009	Neorickettsia_risticii_Illinois_uid58889
NC_007798	Neorickettsia_sennetsu_Miyayama_uid57965
NC_005303	Onion_yellows_phytoplasma_OY_M_uid58015
NC_009488	Orientia_tsutsugamushi_Boryong
NC_010793	Orientia_tsutsugamushi_Ikeda_uid58869
NC_010531	Polynucleobacter_necessarius_STIR1_uid58967
NC_009881	Rickettsia_akari_Hartford_uid58161
NC_009883	Rickettsia_bellii_OSU_85_389_uid58681
NC_007940	Rickettsia_bellii_RML369_C_uid58405
NC_009879	Rickettsia_canadensis_McKiel_uid58159
NC_003103	Rickettsia_conorii_Malish_7_uid57633
NC_007109	Rickettsia_felis_URRWXCal2_uid58331
NC_009900	Rickettsia_massiliae_MTU5_uid58801
NC_012730	Rickettsia_peacockii_Rustic_uid59301
NC_000963	Rickettsia_prowazekii
NC_009882	Rickettsia_rickettsii__Sheila_Smith__uid58027
NC_010263	Rickettsia_rickettsii_Iowa_uid58961
NC_006142	Rickettsia_typhi_Wilmington_uid58063
NC_000919	Treponema_pallidum_Nichols_uid57585
NC_010741	Treponema_pallidum_SS14_uid58977
NS_000191	uncultured_Termite_group_1_bacterium_phylotype_Rs_D17
NC_014225	Waddlia_chondrophila_WSU_86_1044_uid49531
NC_004344	Wigglesworthia_glossinidia_endosymbiont_of_Glossina_brevipalpis_uid57853
NC_010981	Wolbachia_endosymbiont_of_Culex_quinquefasciatus_Pel
NC_002978	Wolbachia_endosymbiont_of_Drosophila_melanogaster_uid57851
NC_006833	Wolbachia_endosymbiont_TRS_of_Brugia_malayi_uid58107

## Sheet: Table S2
Table S2. Detail values for each of the genomic features and strand composition bias. The red contents are obligate intracellular bacteria.
NC	Species Name	Phylum	Generation times	S Value	Genome Size	Bias	GC Content	Gene Density	gcRF	taRF
NC_012483	Acidobacterium_capsulatum_ATCC_51196_uid59127	Acidobacteria	0	0	4127356	0.0144116	0.60497	0.508148	0.521801	0.235513
NC_008009	Candidatus_Koribacter_versatilis_Ellin345_uid58479	Acidobacteria	0	0	5650368	0.00916613	0.583838	0.534548	0.290611	0.170097
NC_008536	Candidatus_Solibacter_usitatus_Ellin6076_uid58139	Acidobacteria	0	0	9965640	0.00379404	0.619025	0.52984	0.826485	0.311926
NC_013721	Gardnerella_vaginalis_409_05_uid43211	Actinobacteria	0	0	1617545	0.0671413	0.420163	0.754762	0.0181405	0.0748121
NC_013203	Atopobium_parvulum_DSM_20469_uid59195	Actinobacteria	0	0	1543805	0.0620111	0.456866	0.766272	0.0218912	0.0800233
NC_013170	Cryptobacterium_curtum_DSM_15641_uid59041	Actinobacteria	0	0	1617804	0.0611594	0.509115	0.75941	0.0157829	0.0716868
NC_011896	Mycobacterium_leprae_Br4923_uid59293	Actinobacteria	0	0.515	3268071	0.0607236	0.577975	0.656893	0.0297909	0.0419834
NC_002677	Mycobacterium_leprae_TN_uid57697	Actinobacteria	240	0.515	3268203	0.0607211	0.577967	0.656484	0.0298039	0.0419709
NC_013124	Acidimicrobium_ferrooxidans_DSM_10331_uid59215	Actinobacteria	0	0	2158157	0.0551522	0.682893	0.665818	0.0533126	0.0506688
NC_014039	Propionibacterium_acnes_SK137_uid48071	Actinobacteria	0	0	2495334	0.0517406	0.601039	0.608677	0.0896892	0.0921508
NC_006085	Propionibacterium_acnes_KPA171202_uid58101	Actinobacteria	5.1	0	2560265	0.0503733	0.600107	0.614111	0.0855023	0.0910802
NC_004551	Tropheryma_whipplei_TW08_27_uid57961	Actinobacteria	0	0	925938	0.0386484	0.46314	0.746787	0.0481051	0.102907
NC_004572	Tropheryma_whipplei_Twist_uid57705	Actinobacteria	0	0.014	927303	0.0377989	0.46332	0.736973	0.0447957	0.108518
NC_013159	Saccharomonospora_viridis_DSM_43017_uid59055	Actinobacteria	0	0	4308349	0.0377864	0.673151	0.590957	0.0488261	0.0446018
NC_009380	Salinispora_tropica_CNB_440_uid58565	Actinobacteria	0	0	5183331	0.0366442	0.69461	0.588313	0.126934	0.0835142
NC_012490	Rhodococcus_erythropolis_PR4_uid59019	Actinobacteria	0	0	6516310	0.0336847	0.623138	0.56477	0.0772183	0.0874705
NC_010397	Mycobacterium_abscessus_ATCC_19977	Actinobacteria	0	0	5067172	0.0326628	0.64131	0.601057	0.0508856	0.0588895
NC_010612	Mycobacterium_marinum_M_uid59423	Actinobacteria	0	0	6636827	0.0320902	0.657266	0.5582	0.0799581	0.0651705
NC_002935	Corynebacterium_diphtheriae_NCTC_13129_uid57691	Actinobacteria	0	0	2488635	0.0317969	0.534785	0.62511	0.174612	0.18474
NC_013204	Eggerthella_lenta_DSM_2243_uid59079	Actinobacteria	0	0	3632260	0.0303469	0.642046	0.678071	0.0507103	0.0863374
NC_012704	Corynebacterium_kroppenstedtii_DSM_44385_uid59411	Actinobacteria	0	0	2446804	0.0297408	0.574599	0.609127	0.0802363	0.108204
NC_014218	Arcanobacterium_haemolyticum_DSM_20595_uid49489	Actinobacteria	0	0	1986154	0.0290179	0.531332	0.671486	0.141344	0.159732
NC_008578	Acidothermus_cellulolyticus_11B_uid58501	Actinobacteria	0	0	2443540	0.0284554	0.669074	0.664349	0.0781738	0.104533
NC_014246	Mobiluncus_curtisii_ATCC_43063_uid49695	Actinobacteria	0	0	2146480	0.0279117	0.554133	0.656184	0.0428061	0.073662
NC_010168	Renibacterium_salmoninarum_ATCC_33209_uid58899	Actinobacteria	0	0	3155250	0.0276618	0.562713	0.583001	0.0369695	0.0671741
NC_007777	Frankia_CcI3_uid58397	Actinobacteria	0	0	5433628	0.0270585	0.700788	0.562917	0.289391	0.150501
NC_009953	Salinispora_arenicola_CNS_205_uid58659	Actinobacteria	0	0	5786361	0.0269359	0.695185	0.598251	0.199204	0.115765
NC_014168	Segniliparus_rotundus_DSM_44985_uid49049	Actinobacteria	0	0	3157527	0.0262449	0.667913	0.604659	0.112123	0.124727
NC_012590	Corynebacterium_aurimucosum_ATCC_700975_uid59409	Actinobacteria	0	0	2790189	0.0261749	0.606342	0.601423	0.445063	0.619667
NC_002755	Mycobacterium_tuberculosis_CDC1551_uid57775	Actinobacteria	0	0	4403837	0.0251372	0.656068	0.586676	0.0742802	0.0616443
NC_003450	Corynebacterium_glutamicum_ATCC_13032_uid57905	Actinobacteria	0	2.185	3309401	0.0250822	0.538103	0.586426	0.285984	0.253705
NC_012207	Mycobacterium_bovis_BCG_Tokyo_172_uid59281	Actinobacteria	0	0	4371711	0.0250609	0.65643	0.592442	0.0662481	0.0578723
NC_002945	Mycobacterium_bovis_AF2122_97_uid57695	Actinobacteria	0	0	4345492	0.0250605	0.65633	0.590248	0.0668212	0.0588423
NC_008769	Mycobacterium_bovis_BCG_Pasteur_1173P2_uid58781	Actinobacteria	0	0	4374522	0.0248535	0.65636	0.590679	0.0667694	0.0579428
NC_000962	Mycobacterium_tuberculosis_H37Rv_uid57777	Actinobacteria	24	0.452	4411532	0.0248227	0.656141	0.58766	0.0685241	0.060734
NC_009565	Mycobacterium_tuberculosis_F11_uid58417	Actinobacteria	0	0	4424435	0.0248219	0.656178	0.590206	0.0708853	0.0581429
NC_009525	Mycobacterium_tuberculosis_H37Ra_uid58853	Actinobacteria	0	0	4419977	0.0247877	0.656125	0.587404	0.0687155	0.0594701
NC_012943	Mycobacterium_tuberculosis_KZN_1435_uid59069	Actinobacteria	0	0	4398250	0.0247289	0.656142	0.590786	0.0721272	0.0586795
NC_008148	Rubrobacter_xylanophilus_DSM_9941_uid58057	Actinobacteria	0	0	3225748	0.0244824	0.704766	0.652756	0.0587521	0.0446655
NC_006958	Corynebacterium_glutamicum_ATCC_13032_Bielefeld	Actinobacteria	1.2	2.185	3282708	0.0244012	0.538418	0.592144	0.274757	0.253179
NC_007164	Corynebacterium_jeikeium_K411_uid58399	Actinobacteria	0	0	2462499	0.0233953	0.613954	0.620837	0.145099	0.129743
NC_009342	Corynebacterium_glutamicum_R_uid58897	Actinobacteria	0	2.185	3314179	0.0222155	0.54133	0.59377	0.298928	0.262184
NC_012814	Bifidobacterium_animalis_lactis_Bl_04_uid59359	Actinobacteria	0	0	1938709	0.0205498	0.604821	0.660281	0.103016	0.146666
NC_012815	Bifidobacterium_animalis_lactis_DSM_10140_uid59357	Actinobacteria	0	0	1938483	0.0205387	0.60482	0.660064	0.103477	0.146517
NC_008611	Mycobacterium_ulcerans_Agy99	Actinobacteria	0	0	5631606	0.0204897	0.654727	0.569127	0.115611	0.0861704
NC_009142	Saccharopolyspora_erythraea_NRRL_2338	Actinobacteria	0	0	8212805	0.0200939	0.71146	0.572422	0.125036	0.0991252
NC_008278	Frankia_alni_ACN14a_uid58695	Actinobacteria	0	0	7497934	0.0199876	0.728281	0.546742	4.50689	2.1013
NC_013714	Bifidobacterium_dentium_Bd1	Actinobacteria	0	0	2636367	0.0194476	0.585367	0.661495	0.137005	0.185045
NC_009921	Frankia_EAN1pec_uid58367	Actinobacteria	0	0	8982042	0.0191435	0.711536	0.548122	-2.77876	-1.41196
NC_013165	Slackia_heliotrinireducens_DSM_20476_uid59051	Actinobacteria	0	0	3165038	0.0189906	0.602116	0.67547	0.110663	0.142428
NC_013441	Gordonia_bronchialis_DSM_43247	Actinobacteria	0	0	5208602	0.0164351	0.670724	0.559601	2.9242	2.6946
NC_013169	Kytococcus_sedentarius_DSM_20547_uid59071	Actinobacteria	0	0	2785024	0.0159912	0.716275	0.589111	0.26455	0.183214
NC_010545	Corynebacterium_urealyticum_DSM_7109	Actinobacteria	0	0	2369219	0.0158369	0.641852	0.619307	0.371092	0.361793
NC_008268	Rhodococcus_jostii_RHA1_uid58325	Actinobacteria	0	0	7804765	0.0147245	0.675158	0.564832	1.09085	0.783698
NC_006087	Leifsonia_xyli_CTCB07_uid57759	Actinobacteria	5	0	2584158	0.0136493	0.67676	0.616256	-0.36938	-0.338711
NC_013174	Jonesia_denitrificans_DSM_20603_uid59053	Actinobacteria	0	0	2749646	0.012502	0.584167	0.596414	-3.6601	-2.25865
NC_014151	Cellulomonas_flavigena_DSM_20109_uid48821	Actinobacteria	0	0	4123179	0.0124406	0.742936	0.565679	0.353873	0.276373
NC_012669	Beutenbergia_cavernae_DSM_12333_uid59047	Actinobacteria	0	0	4669183	0.0121625	0.731166	0.586034	0.210626	0.228611
NC_013235	Nakamurella_multipartita_DSM_44233_uid59221	Actinobacteria	0	0	6060298	0.0119301	0.709165	0.569574	0.327978	0.298865
NC_008711	Arthrobacter_aurescens_TC1_uid58109	Actinobacteria	0	0	4597686	0.0114614	0.62343	0.567962	-0.480742	-0.622399
NC_013729	Kribbella_flavida_DSM_17836_uid43465	Actinobacteria	0	0	7579488	0.0112079	0.705679	0.582049	0.247273	0.143177
NC_009338	Mycobacterium_gilvum_PYR_GCK_uid59421	Actinobacteria	0	0	5619607	0.0111515	0.679166	0.572137	0.164388	0.156674
NC_014215	Propionibacterium_freudenreichii_shermanii_CIRM_BIA1_uid49535	Actinobacteria	0	0	2616384	0.0108776	0.672661	0.590143	0.694691	0.555682
NC_008726	Mycobacterium_vanbaalenii_PYR_1_uid58463	Actinobacteria	0	0	6491865	0.0107511	0.677931	0.576447	0.148249	0.136485
NC_007333	Thermobifida_fusca_YX_uid57703	Actinobacteria	0	0	3642249	0.0105509	0.675029	0.552911	-0.299427	-0.139698
NC_013595	Streptosporangium_roseum_DSM_43021	Actinobacteria	0	0	10341314	0.010418	0.708666	0.540036	-0.793423	-0.479708
NC_014158	Tsukamurella_paurometabola_DSM_20162_uid48829	Actinobacteria	0	0	4379918	0.0102417	0.68413	0.580606	0.874513	0.767317
NC_011835	Bifidobacterium_animalis_lactis_AD011_uid58911	Actinobacteria	0	0	1933695	0.00944668	0.604904	0.58519	0.199728	0.272636
NC_004369	Corynebacterium_efficiens_YS-314	Actinobacteria	0	1.04	3147090	0.00898481	0.6314	0.572012	-0.301581	-0.244272
NC_014165	Thermobispora_bispora_DSM_43833_uid48999	Actinobacteria	0	0	4189976	0.008759	0.724292	0.6	0.499418	0.436939
NC_013739	Conexibacter_woesei_DSM_14684_uid43467	Actinobacteria	0	0	6359369	0.00851044	0.727334	0.607982	0.310125	0.323062
NC_008596	Mycobacterium_smegmatis_MC2_155_uid57701	Actinobacteria	0	0	6988209	0.00841632	0.674028	0.567898	0.28441	0.312425
NC_010617	Kocuria_rhizophila_DC2201_uid59099	Actinobacteria	0	0	2697540	0.00835873	0.711638	0.608068	4.47548	5.66637
NC_006361	Nocardia_farcinica_IFM_10152_uid58203	Actinobacteria	3	0	6021225	0.00777466	0.708334	0.56645	-0.534307	-0.302101
NC_011593	Bifidobacterium_longum_infantis_ATCC_15697_uid58677	Actinobacteria	0	1.344	2832748	0.00709911	0.598631	0.62029	-2.86439	-3.22657
NC_008146	Mycobacterium_MCS_uid58465	Actinobacteria	0	0	5705448	0.0058828	0.684534	0.582267	0.549447	0.532743
NC_008705	Mycobacterium_KMS_uid58491	Actinobacteria	0	0	5737227	0.00580437	0.684377	0.58022	0.567309	0.550471
NC_009077	Mycobacterium_JLS_uid58489	Actinobacteria	0	0	6048425	0.0057372	0.683564	0.573793	0.404973	0.408015
NC_008595	Mycobacterium_avium_104_uid57693	Actinobacteria	0	0	5475491	0.00540719	0.689881	0.569643	0.283601	0.273615
NC_013757	Geodermatophilus_obscurus_DSM_43160_uid43725	Actinobacteria	0	0	5322497	0.00518911	0.739841	0.583333	-0.447689	-0.42043
NC_013530	Xylanimonas_cellulosilytica_DSM_15894	Actinobacteria	0	0	3742776	0.0051721	0.724876	0.572842	-0.174054	-0.125399
NC_013947	Stackebrandtia_nassauensis_DSM_44728_uid46663	Actinobacteria	0	0	6841557	0.00495107	0.681339	0.487143	-0.405658	-0.204132
NC_008541	Arthrobacter_FB24_uid58141	Actinobacteria	0	0	4698945	0.00491195	0.654662	0.563011	-0.141848	-0.177804
NC_002944	Mycobacterium_avium_paratuberculosis_K_10_uid57699	Actinobacteria	10	0	4829781	0.00486254	0.692986	0.541274	0.284364	0.274852
NC_003155	Streptomyces_avermitilis_MA_4680_uid57739	Actinobacteria	0	0.686	9025608	0.00457676	0.707166	0.531135	-0.253507	-0.118333
NC_012803	Micrococcus_luteus_NCTC_2665_uid59033	Actinobacteria	0	0	2501097	0.0045576	0.729952	0.50783	-0.112411	-0.0896414
NC_004307	Bifidobacterium_longum_NCC2705_uid57939	Actinobacteria	0	1.344	2256640	0.00426475	0.601198	0.667439	-0.16256	-0.177575
NC_014169	Bifidobacterium_longum_JDM301_uid49131	Actinobacteria	0	1.344	2477838	0.00417864	0.598149	0.6372	-0.33489	-0.337072
NC_008699	Nocardioides_JS614_uid58149	Actinobacteria	0	0	4985871	0.00404844	0.71652	0.609173	-0.186086	-0.196949
NC_009480	Clavibacter_michiganensis_NCPPB_382	Actinobacteria	0	0	3297891	0.0037336	0.726642	0.501174	-0.0501795	-0.0492197
NC_009664	Kineococcus_radiotolerans_SRS30216_uid58067	Actinobacteria	0	0	4761183	0.00358797	0.74435	0.492074	-0.126566	-0.0575024
NC_010407	Clavibacter_michiganensis_sepedonicus	Actinobacteria	0	0	3258645	0.00308932	0.725562	0.470208	-0.0596625	-0.0530435
NC_013510	Thermomonospora_curvata_DSM_43183	Actinobacteria	0	0	5639016	0.00307713	0.71642	0.569939	35.9815	17.9099
NC_013715	Rothia_mucilaginosa	Actinobacteria	0	0	2264603	0.00298375	0.596223	0.491597	-0.713449	-0.626793
NC_013131	Catenulispora_acidiphila_DSM_44928_uid59077	Actinobacteria	0	0	10467782	0.00298248	0.697671	0.536131	-0.513856	-0.217023
NC_014210	Nocardiopsis_dassonvillei_DSM_43111_uid49483	Actinobacteria	0	0	5767958	0.0025503	0.728292	0.502501	-0.259111	-0.11315
NC_013929	Streptomyces_scabiei_87_22_uid46531	Actinobacteria	0	0	10148695	0.00217851	0.714528	0.535963	-0.190944	-0.0705962
NC_008618	Bifidobacterium_adolescentis_ATCC_15703_uid58559	Actinobacteria	0	0	4669183	0.00216954	0.264873	0.580625	22.1335	29.4067
NC_011886	Arthrobacter_chlorophenolicus_A6_uid58969	Actinobacteria	0	0	4395537	0.00182435	0.662797	0.542739	-0.0939463	-0.102274
NC_010572	Streptomyces_griseus_NBRC_13350_uid58983	Actinobacteria	0	0	8545929	0.00162311	0.722274	0.508969	-0.185072	-0.0739325
NC_013172	Brachybacterium_faecium_DSM_4810_uid58649	Actinobacteria	0	0	3614992	0.00145339	0.720458	0.490042	-0.0538582	-0.056696
NC_010816	Bifidobacterium_longum_DJO10A_uid58833	Actinobacteria	0	1.344	2375792	0.00143026	0.601461	0.599598	-0.201005	-0.22087
NC_003888	Streptomyces_coelicolor_A3_2__uid57801	Actinobacteria	2.2	0.986	8667507	0.00140652	0.721187	0.49163	-0.186651	-0.0781958
NC_013093	Actinosynnema_mirum_DSM_43827_uid58951	Actinobacteria	0	0	8248144	0.000442766	0.737089	0.50998	0.246562	0.0626841
NC_012440	Persephonella_marina_EX_H1_uid58119	Aquificae	0	0	1930284	0.0187029	0.371564	0.520707	0.0183508	0.0648109
NC_012438	Sulfurihydrogenibium_azorense_Az_Fu1_uid58121	Aquificae	0	0	1640877	0.0128273	0.327529	0.558653	0.0261801	0.124883
NC_011126	Hydrogenobaculum_Y04AAS1_uid58857	Aquificae	0	0	1559514	0.0126616	0.34847	0.486486	0.0258386	0.100268
NC_010730	Sulfurihydrogenibium_YO3AOP1_uid58855	Aquificae	0	0	1838442	0.0064435	0.320274	0.539267	0.0215188	0.11013
NC_013799	Hydrogenobacter_thermophilus_TK_6_uid45927	Aquificae	0	0	1743135	0.00636267	0.440003	0.505814	0.0325121	0.0726971
NC_013894	Thermocrinis_albus_DSM_14484_uid46231	Aquificae	0	0	1500577	0.00558652	0.469305	0.463859	0.0322048	0.0635026
NC_000918	Aquifex_aeolicus_VF5_uid57765	Aquificae	0	0.393	1551335	0.00440588	0.434762	0.525213	0.0307452	0.0970196
NC_009614	Bacteroides_vulgatus_ATCC_8482_uid58253	Bacteroidetes	0	0	5163189	0.0637558	0.422015	0.545141	0.0202557	0.0519837
NC_007498	Pelobacter_carbinolicus_DSM_2380_uid58241	Bacteroidetes	0	0	3665893	0.0594979	0.551137	0.626977	0.03326	0.0768087
NC_009615	Parabacteroides_distasonis_ATCC_8503_uid58301	Bacteroidetes	0	0	4811379	0.0578601	0.450596	0.601871	0.0177513	0.0432551
NC_006347	Bacteroides_fragilis_YCH46_uid58195	Bacteroidetes	0.63	0	5277274	0.0573398	0.43266	0.555386	0.0241567	0.068069
NC_003228	Bacteroides_fragilis_NCTC_9343_uid57639	Bacteroidetes	0	0	5205140	0.0560235	0.431906	0.571702	0.0193623	0.0579272
NC_011565	Candidatus_Azobacteroides_pseudotrichonymphae_genomovar__CFP2_uid59163	Bacteroidetes	0	0	1114206	0.0539218	0.326575	0.582011	0.0144763	0.0574487
NC_004663	Bacteroides_thetaiotaomicron_VPI-5482	Bacteroidetes	1.47	0.237	6260361	0.0483309	0.428372	0.579531	0.0206934	0.0542408
NC_014033	Prevotella_ruminicola_23_uid47507	Bacteroidetes	0	0	3619559	0.0326302	0.476855	0.575308	0.0277839	0.0584353
NC_013501	Rhodothermus_marinus_DSM_4252	Bacteroidetes	0	0	3261604	0.0325466	0.645371	0.600579	0.0460024	0.0573653
NC_007677	Salinibacter_ruber_DSM_13855_uid58513	Bacteroidetes	0	0	3551823	0.0277122	0.662167	0.566631	0.0746958	0.111876
NC_014032	Salinibacter_ruber_M8_uid47323	Bacteroidetes	0	0	3619447	0.027494	0.661176	0.55869	0.0762775	0.112909
NC_008609	Pelobacter_propionicus_DSM_2379_uid58255	Bacteroidetes	0	0	4008000	0.0268064	0.590242	0.56967	0.126481	0.155947
NC_013061	Pedobacter_heparinus_DSM_2366_uid59111	Bacteroidetes	0	0	5167383	0.0267991	0.420489	0.626824	0.0215683	0.0576196
NC_013132	Chitinophaga_pinensis_DSM_2588_uid59113	Bacteroidetes	0	0	9127347	0.0236536	0.452271	0.571767	0.035683	0.0652745
NC_014041	Zunongwangia_profunda_SM_A87_uid48073	Bacteroidetes	0	0	5128187	0.0220528	0.362185	0.56332	0.0194597	0.0814053
NC_008255	Cytophaga_hutchinsonii_ATCC_33406_uid57651	Bacteroidetes	0	0	4433218	0.0210669	0.388465	0.564218	0.0197746	0.0896626
NC_008571	Gramella_forsetii_KT0803_uid58881	Bacteroidetes	0	0	3798465	0.0201663	0.366108	0.572585	0.0163797	0.0689857
NC_010830	Candidatus_Amoebophilus_asiaticus_5a2_uid58963	Bacteroidetes	0	0	1884364	0.0196098	0.35045	0.557721	0.0270685	0.116223
NC_013123	Candidatus_Sulcia_muelleri_SMDSEM_uid59393	Bacteroidetes	0	0	276984	0.0193369	0.225952	0.548117	0.0131789	0.110158
NC_009441	Flavobacterium_johnsoniae_UW101_uid58493	Bacteroidetes	0	0	6096872	0.0179958	0.341129	0.518939	0.0151293	0.072233
NC_013730	Spirosoma_linguale_DSM_74_uid43413	Bacteroidetes	0	0	8078757	0.0175031	0.501928	0.476205	0.0551692	0.157706
NC_013037	Dyadobacter_fermentans_DSM_18053_uid59049	Bacteroidetes	0	0	6967790	0.0172103	0.51545	0.506734	0.0486636	0.121153
NC_013454	Blattabacterium__Blattella_germanica__Bge	Bacteroidetes	0	0	636850	0.0153474	0.271417	0.560892	0.0143532	0.110784
NC_013418	Blattabacterium__Periplaneta_americana__BPLAN	Bacteroidetes	0	0	636994	0.0149735	0.282109	0.563478	0.0170381	0.0898975
NC_010729	Porphyromonas_gingivalis_ATCC_33277_uid58879	Bacteroidetes	0	0	2354886	0.0139531	0.483593	0.51341	0.0602495	0.178422
NC_014230	Croceibacter_atlanticus_HTCC2559_uid49661	Bacteroidetes	0	0	2952962	0.0138363	0.339	0.52388	0.0143568	0.0778549
NC_002950	Porphyromonas_gingivalis_W83_uid57641	Bacteroidetes	2.7	0	2343476	0.013835	0.482879	0.536445	0.0604752	0.171307
NC_013062	Flavobacteriaceae_bacterium_3519_10_uid59413	Bacteroidetes	0	0	2768102	0.013114	0.426928	0.568325	0.031228	0.150628
NC_009613	Flavobacterium_psychrophilum_JIP02_86	Bacteroidetes	0	0	2861988	0.012789	0.325394	0.56592	0.0380128	0.164372
NC_014004	Candidatus_Sulcia_muelleri_DMIN_uid47075	Bacteroidetes	0	0	243933	0.0124419	0.224931	0.477679	0.00971766	0.148299
NC_013222	Robiginitalea_biformata_HTCC2501_uid58285	Bacteroidetes	0	0	3530383	0.0114092	0.552933	0.524953	0.0544671	0.145493
NC_013162	Capnocytophaga_ochracea_DSM_7271_uid59197	Bacteroidetes	0	0	2612925	0.0112919	0.39588	0.529059	0.0726634	0.168525
NC_010118	Candidatus_Sulcia_muelleri_GWSS_uid58943	Bacteroidetes	0	0	245530	0.0102798	0.224408	0.473214	0.00947408	0.0927826
NC_002620	Chlamydia_muridarum_Nigg_uid57785	Chlamydiae	24	0.145	1072950	0.0675977	0.403365	0.54928	0.0140034	0.0499495
NC_010287	Chlamydia_trachomatis_434_Bu	Chlamydiae	0	0.132	1038842	0.0647509	0.413291	0.556193	0.0120149	0.0503835
NC_010280	Chlamydia_trachomatis_L2b_UCH_1_proctitis	Chlamydiae	0	0.132	1038869	0.064704	0.41328	0.556193	0.0119783	0.0504632
NC_012687	Chlamydia_trachomatis_B_TZ1A828_OT_uid59349	Chlamydiae	0	0.132	1044282	0.0644653	0.413025	0.555809	0.0127484	0.0518278
NC_012686	Chlamydia_trachomatis_B_Jali20_OT_uid59351	Chlamydiae	0	0.132	1044352	0.0643883	0.412992	0.556701	0.0125392	0.0505681
NC_007429	Chlamydia_trachomatis_A_HAR_13_uid58333	Chlamydiae	0	0.132	1044459	0.0643845	0.413026	0.556656	0.012998	0.0535213
NC_000117	Chlamydia_trachomatis_D_UW_3_CX_uid57637	Chlamydiae	24	0.132	1042519	0.0642722	0.413073	0.558166	0.0130953	0.0525894
NC_007899	Chlamydophila_felis_Fe_C_56_uid57971	Chlamydiae	0	0	1166239	0.0559242	0.393754	0.511952	0.0170229	0.0781257
NC_014225	Waddlia_chondrophila_WSU_86_1044_uid49531	Chlamydiae	0	0	2116312	0.0551771	0.437802	0.519938	0.0252403	0.082323
NC_000922	Chlamydophila_pneumoniae_CWL029_uid57811	Chlamydiae	0	0	1230230	0.0517415	0.405777	0.551001	0.0347154	0.106667
NC_002179	Chlamydophila_pneumoniae_AR39_uid57809	Chlamydiae	24	-0.065	1229853	0.051733	0.405726	0.546355	0.0363538	0.108689
NC_005043	Chlamydophila_pneumoniae_TW_183_uid57997	Chlamydiae	0	0	1225935	0.0516561	0.405762	0.551755	0.0361045	0.106715
NC_002491	Chlamydophila_pneumoniae_J138_uid57829	Chlamydiae	0	0	1226565	0.051513	0.405815	0.551078	0.0345715	0.105946
NC_003361	Chlamydophila_caviae_GPIC_uid57783	Chlamydiae	24	0.113	1173390	0.0503754	0.392229	0.538616	0.0228243	0.0859615
NC_004552	Chlamydophila_abortus_S26_3_uid57963	Chlamydiae	24	0	1144377	0.0503252	0.398664	0.530108	0.0218525	0.0859338
NC_005861	Candidatus_Protochlamydia_amoebophila_UWE25_uid58079	Chlamydiae	48	0	2414465	0.0154084	0.347173	0.525616	0.0430134	0.176563
NC_009337	Chlorobium_phaeovibrioides_DSM_265_uid58129	Chlorobi	0	0	1966858	0.0820039	0.529917	0.567676	0.0529842	0.0777459
NC_011059	Prosthecochloris_aestuarii_DSM_271_uid58151	Chlorobi	0	0	2512923	0.0811115	0.500951	0.605042	0.0335689	0.0827995
NC_010831	Chlorobium_phaeobacteroides_BS1_uid58131	Chlorobi	0	0	2736403	0.0573443	0.489271	0.617099	0.0283112	0.0666894
NC_008639	Chlorobium_phaeobacteroides_DSM_266_uid58133	Chlorobi	0	0	3133902	0.0559922	0.483514	0.604607	0.040403	0.0899384
NC_010803	Chlorobium_limicola_DSM_245_uid58127	Chlorobi	0	0	2763181	0.0536096	0.513168	0.590218	0.0444075	0.097686
NC_011027	Chlorobaculum_parvum_NCIB_8327_uid59185	Chlorobi	0	0	2289249	0.0498631	0.557961	0.575624	0.0595568	0.124457
NC_007512	Chlorobium_luteolum_DSM_273_uid58175	Chlorobi	0	0	2364842	0.0477444	0.5733	0.569918	0.214698	0.269364
NC_011060	Pelodictyon_phaeoclathratiforme_BU_1_uid58173	Chlorobi	0	0	3018238	0.0470427	0.480776	0.605341	0.0463751	0.095794
NC_002932	Chlorobium_tepidum_TLS_uid57897	Chlorobi	2	0.069	2154946	0.0429834	0.565296	0.564365	0.081702	0.179313
NC_007514	Chlorobium_chlorochromatii_CaD3_uid58375	Chlorobi	0	0	2572079	0.0327389	0.442782	0.571928	0.0461722	0.0972173
NC_011026	Chloroherpeton_thalassium_ATCC_35110_uid59187	Chlorobi	0	0	3293456	0.0209786	0.450389	0.551164	0.0229876	0.0816535
NC_013525	Thermobaculum_terrenum_ATCC_BAA_798	Chloroflexi	0	0	2026947	0.046424	0.480728	0.557589	0.0241507	0.0428468
NC_013552	Dehalococcoides_VS	Chloroflexi	0	0	1413462	0.0420174	0.472714	0.527816	0.0233505	0.0800368
NC_007356	Dehalococcoides_CBDB1_uid58413	Chloroflexi	0	0	1395502	0.0412339	0.470259	0.519561	0.0242583	0.079522
NC_011959	Thermomicrobium_roseum_DSM_5159_uid59341	Chloroflexi	0	0	2003006	0.0389564	0.63647	0.482759	0.0480842	0.051155
NC_013890	Dehalococcoides_GT_uid42115	Chloroflexi	0	0	1360154	0.0388603	0.473145	0.527581	0.0229429	0.0819835
NC_002936	Dehalococcoides_ethenogenes_195_uid57763	Chloroflexi	19	0	1469720	0.0369404	0.488503	0.514575	0.0309712	0.0845967
NC_009455	Dehalococcoides_BAV1_uid58477	Chloroflexi	0	0	1341892	0.0312872	0.471726	0.480292	0.0290606	0.0899712
NC_013523	Sphaerobacter_thermophilus_DSM_20745	Chloroflexi	0	0	2741033	0.0290799	0.681028	0.519902	0.0584053	0.0573631
NC_013526	Thermobaculum_terrenum_ATCC_BAA_798	Chloroflexi	0	0	1074634	0.0259046	0.637577	0.502058	0.0447429	0.0342878
NC_014314	Dehalogenimonas_lykanthroporepellens_BL_DC_9_uid48131	Chloroflexi	0	0	1686510	0.0172214	0.550444	0.512666	0.0763784	0.12809
NC_009767	Roseiflexus_castenholzii_DSM_13941_uid58287	Chloroflexi	0	0	5723298	0.01622	0.606901	0.509473	0.0442783	0.0695987
NC_009972	Herpetosiphon_aurantiacus_ATCC_23779_uid58599	Chloroflexi	0	0	6346587	0.0134171	0.507157	0.501708	0.0618161	0.118524
NC_009523	Roseiflexus_RS_1_uid58523	Chloroflexi	0	0	5801598	0.0082529	0.603873	0.49933	0.0554379	0.0721962
NC_012032	Chloroflexus_Y_400_fl_uid59085	Chloroflexi	0	0	5268950	0.00612873	0.566819	0.503127	0.108465	0.105032
NC_010175	Chloroflexus_aurantiacus_J_10_fl_uid57657	Chloroflexi	0	0	5258541	0.00607526	0.566972	0.49974	0.0830204	0.0955879
NC_011831	Chloroflexus_aggregans_DSM_9485_uid58621	Chloroflexi	0	0	4684931	0.00187132	0.564285	0.522124	0.110628	0.118187
NC_005071	Prochlorococcus_marinus_MIT_9313_uid57773	Cyanobacteria	0	0	2410873	0.0695839	0.507398	0.484782	0.0346959	0.0857355
NC_008820	Prochlorococcus_marinus_MIT_9303_uid58305	Cyanobacteria	0	0	2682675	0.0673891	0.500076	0.491322	0.0500343	0.105421
NC_007513	Synechococcus_CC9902_uid58323	Cyanobacteria	0	0	2234828	0.062727	0.541645	0.483731	0.0354771	0.067708
NC_008319	Synechococcus_CC9311_uid58123	Cyanobacteria	0	0	2606748	0.0591035	0.524473	0.496022	0.0492604	0.104017
NC_005042	Prochlorococcus_marinus_CCMP1375_uid57995	Cyanobacteria	17	0	1751080	0.0507493	0.364421	0.506376	0.0226884	0.0840119
NC_009976	Prochlorococcus_marinus_MIT_9211_uid58309	Cyanobacteria	0	0	1688963	0.0460407	0.380073	0.518898	0.0238859	0.084887
NC_009481	Synechococcus_WH_7803	Cyanobacteria	0	0	2366980	0.0426696	0.60236	0.479068	0.0614161	0.1053
NC_007516	Synechococcus_CC9605_uid58319	Cyanobacteria	0	0	2510659	0.041948	0.592176	0.481467	0.0674287	0.130703
NC_008819	Prochlorococcus_marinus_NATL1A_uid58423	Cyanobacteria	0	0	1864731	0.0403045	0.349793	0.522354	0.0266342	0.115116
NC_005070	Synechococcus_sp_WH8102	Cyanobacteria	6	0	2434428	0.0401039	0.594126	0.48828	0.0519767	0.0867174
NC_009482	Synechococcus_RCC307	Cyanobacteria	0	0	2224914	0.0400811	0.608435	0.482227	0.0688166	0.118563
NC_010547	Cyanothece_ATCC_51142_uid59013	Cyanobacteria	0	0	429701	0.0266441	0.385687	0.605791	0.0866507	0.278314
NC_008817	Prochlorococcus_marinus_MIT_9515_uid58313	Cyanobacteria	0	0	1704176	0.0227441	0.307942	0.522059	0.0209763	0.100568
NC_007577	Prochlorococcus_marinus_MIT_9312_uid58357	Cyanobacteria	0	0	1709204	0.0223929	0.312105	0.528469	0.0192775	0.0810642
NC_009091	Prochlorococcus_marinus_MIT_9301_uid58437	Cyanobacteria	0	0	1641879	0.0221301	0.313399	0.51811	0.0211315	0.101165
NC_008816	Prochlorococcus_marinus_AS9601_uid58307	Cyanobacteria	0	0	1669886	0.022059	0.313215	0.524231	0.0218046	0.106962
NC_009840	Prochlorococcus_marinus_MIT_9215_uid58819	Cyanobacteria	0	0	1738790	0.021837	0.31145	0.526502	0.021494	0.103986
NC_005072	Prochlorococcus_marinus_pastoris_CCMP1986_uid57761	Cyanobacteria	0	0	1657990	0.020789	0.307992	0.528555	0.0204793	0.0874774
NC_009925	Acaryochloris_marina_MBIC11017_uid58167	Cyanobacteria	0	0	6503724	0.0111106	0.472539	0.495122	0.172854	0.23075
NC_011884	Cyanothece_PCC_7425_uid59435	Cyanobacteria	0	0	5374574	0.00929934	0.507885	0.518944	0.156717	0.230905
NC_007604	Synechococcus_elongatus_PCC_7942_uid58045	Cyanobacteria	0	0	2695903	0.00920619	0.5547	0.51876	0.366106	0.576282
NC_006576	Synechococcus_elongatus_PCC_6301_uid58235	Cyanobacteria	0	0	2696255	0.009159	0.554843	0.518797	0.294966	0.46411
NC_013771	cyanobacterium_UCYN_A_uid43697	Cyanobacteria	0	0	1443806	0.00448121	0.311168	0.494157	0.0249061	0.119871
NC_004113	Thermosynechococcus_elongatus_BP_1_uid57907	Cyanobacteria	0	0.178	2593857	0.00406537	0.539179	0.499192	-15.574	-27.7563
NC_007413	Anabaena_variabilis_ATCC_29413_uid58043	Cyanobacteria	0	0	6365727	0.00385392	0.414214	0.523602	0.0810281	0.172803
NC_007335	Prochlorococcus_marinus_NATL2A_uid58359	Cyanobacteria	0	0	1842899	0.00372511	0.35123	0.475463	0.0372547	0.143575
NC_011729	Cyanothece_PCC_7424_uid59025	Cyanobacteria	0	0	5942652	0.00275029	0.38609	0.505941	0.115328	0.224044
NC_000911	Synechocystis_PCC_6803_uid57659	Cyanobacteria	0	0.678	3573470	0.00229693	0.477203	0.519358	0.122865	0.22578
NC_007775	Synechococcus_JA_3_3Ab_uid58535	Cyanobacteria	0	0	2932766	0.00194492	0.602373	0.501449	0.28769	0.34467
NC_005125	Gloeobacter_violaceus_PCC_7421_uid58011	Cyanobacteria	0	0	4659019	0.00175938	0.619979	0.502935	-0.855219	-0.982879
NC_013161	Cyanothece_PCC_8802_uid59143	Cyanobacteria	0	0	4669813	0.00146708	0.398213	0.496523	0.128073	0.358263
NC_008312	Trichodesmium_erythraeum_IMS101_uid57925	Cyanobacteria	0	0	7750108	0.00133521	0.341434	0.503482	0.0458727	0.112495
NC_010296	Microcystis_aeruginosa_NIES_843_uid59101	Cyanobacteria	0	0	5842795	0.00130879	0.423306	0.506339	0.243521	0.401109
NC_010546	Cyanothece_ATCC_51142_uid59013	Cyanobacteria	0	0	4934271	0.00123605	0.378754	0.498739	0.0806259	0.268722
NC_011726	Cyanothece_PCC_8801_uid59027	Cyanobacteria	0	0	4679413	0.00113668	0.397611	0.503173	0.129278	0.324509
NC_010475	Synechococcus_PCC_7002_uid59137	Cyanobacteria	0	0	3008047	0.00112133	0.49631	0.514529	-0.28138	-0.433743
NC_010628	Nostoc_punctiforme_PCC_73102_uid57767	Cyanobacteria	0	0	8234322	0.000898192	0.41415	0.519332	0.0558213	0.136574
NC_014248	Nostoc_azollae__0708_uid49725	Cyanobacteria	0	0	5354700	0.000843371	0.384486	0.512263	0.0744398	0.192706
NC_003272	Nostoc_PCC_7120_uid57803	Cyanobacteria	0	0.763	6413771	0.000813406	0.413475	0.519948	0.0853253	0.173598
NC_007776	Synechococcus_JA_2_3B_a_2_13__uid58537	Cyanobacteria	0	0	3046682	0.000776583	0.584503	0.506471	0.161296	0.205751
NC_013939	Deferribacter_desulfuricans_SSM1_uid46653	Deferribacteres	0	0	2234389	0.0569261	0.311183	0.693906	0.0105084	0.0475208
NC_013943	Denitrovibrio_acetiphilus_DSM_12809_uid46657	Deferribacteres	0	0	3222077	0.0465771	0.425366	0.590924	0.014709	0.0678115
NC_005835	Thermus_thermophilus_HB27_uid58033	Deinococcus-Thermus	2.5	0	1894877	0.0245805	0.694373	0.503281	0.234294	0.209398
NC_013946	Meiothermus_ruber_DSM_1279_uid46661	Deinococcus-Thermus	0	0	3097457	0.0238412	0.633844	0.539509	0.0992273	0.1312
NC_014221	Truepera_radiovictrix_DSM_17093_uid49533	Deinococcus-Thermus	0	0	3260398	0.0224414	0.68139	0.487232	0.383035	0.624069
NC_014212	Meiothermus_silvanus_DSM_9946_uid49485	Deinococcus-Thermus	0	0	3249394	0.0187426	0.623636	0.522182	0.0993993	0.116643
NC_006461	Thermus_thermophilus_HB8_uid58223	Deinococcus-Thermus	0	0	1849742	0.0158482	0.695179	0.510142	0.406835	0.327166
NC_008025	Deinococcus_geothermalis_DSM_11300_uid58275	Deinococcus-Thermus	0	0	2467205	0.0136482	0.666362	0.521683	0.122398	0.160759
NC_012526	Deinococcus_deserti_VCD115_uid58615	Deinococcus-Thermus	0	0	2819842	0.00994453	0.633882	0.51659	0.0894416	0.146882
NC_001264	Deinococcus_radiodurans_R1_uid57665	Deinococcus-Thermus	0	1.491	412348	0.0062617	0.666881	0.546703	-2.00292	-2.23699
NC_001263	Deinococcus_radiodurans_R1_uid57665	Deinococcus-Thermus	0	1.491	2648638	0.00367094	0.670104	0.512987	-0.403106	-0.580965
NC_011661	Dictyoglomus_turgidum_DSM_6724_uid59177	Dictyoglomi	0	0	1855560	0.0592576	0.339573	0.689616	0.0161677	0.053714
NC_011297	Dictyoglomus_thermophilum_H_6_12_uid59439	Dictyoglomi	0	0	1959987	0.0449284	0.33741	0.672775	0.0226517	0.0564887
NS_000191	uncultured_Termite_group_1_bacterium_phylotype_Rs_D17	Elusimicrobia	0	0	1125857	0.074124	0.352074	0.792105	0.0130807	0.0501187
NC_010644	Elusimicrobium_minutum_Pei191_uid58949	Elusimicrobia	0	0	1643562	0.0307113	0.399521	0.661871	0.0167283	0.107178
NC_013410	Fibrobacter_succinogenes_S85	Fibrobacteres	0	0	3842635	0.0569008	0.480518	0.580603	0.0479162	0.0882158
NC_004557	Clostridium_tetani_E88_uid57683	Firmicutes	0	1.004	2799251	0.147906	0.287493	0.811448	0.00720505	0.043235
NC_008593	Clostridium_novyi_NT_uid58643	Firmicutes	0	0	2547720	0.145052	0.288557	0.836285	0.00861705	0.0474259
NC_010674	Clostridium_botulinum_B_Eklund_17B_uid59159	Firmicutes	0	0	3800327	0.140546	0.275114	0.851051	0.00786857	0.0422047
NC_010723	Clostridium_botulinum_E3_Alaska_E43_uid59157	Firmicutes	0	0	3659644	0.137696	0.273612	0.845209	0.00733159	0.0406355
NC_003366	Clostridium_perfringens_13_uid57681	Firmicutes	0.2	2.648	3031430	0.13519	0.285661	0.830011	0.00831977	0.0394259
NC_008261	Clostridium_perfringens_ATCC_13124_uid57901	Firmicutes	0	2.648	3256683	0.1345	0.283792	0.817328	0.00851868	0.0414449
NC_012563	Clostridium_botulinum_A2_Kyoto_uid59229	Firmicutes	0	0	4155278	0.132369	0.28211	0.830539	0.0104501	0.0586699
NC_012658	Clostridium_botulinum_Ba4_657_uid59173	Firmicutes	0	0	3977794	0.130484	0.282201	0.830352	0.0105021	0.0579906
NC_009495	Clostridium_botulinum_A	Firmicutes	0	0	3886916	0.129998	0.282447	0.830812	0.0101733	0.0594171
NC_009699	Clostridium_botulinum_F_Langeland_uid58929	Firmicutes	0	0	3995387	0.129825	0.283089	0.829752	0.0099454	0.0571
NC_009697	Clostridium_botulinum_A_ATCC_19397_uid58927	Firmicutes	0	0	3863450	0.129397	0.282053	0.825303	0.00966903	0.0574157
NC_010520	Clostridium_botulinum_A3_Loch_Maree_uid59149	Firmicutes	0	0	3992906	0.128933	0.283109	0.828407	0.0101248	0.0582625
NC_010516	Clostridium_botulinum_B1_Okra_uid59147	Firmicutes	0	0	3958233	0.128722	0.283359	0.830504	0.0104115	0.0583312
NC_009698	Clostridium_botulinum_A_Hall_uid58931	Firmicutes	0	0	3760560	0.128474	0.281847	0.823529	0.00975614	0.0573214
NC_008262	Clostridium_perfringens_SM101_uid58117	Firmicutes	0	2.648	2897393	0.128442	0.28249	0.811714	0.00927044	0.0411175
NC_009617	Clostridium_beijerinckii_NCIMB_8052_uid58137	Firmicutes	0	0	6000632	0.126726	0.298556	0.828053	0.00897832	0.0389668
NC_013315	Clostridium_difficile_CD196	Firmicutes	0	0	4110554	0.125531	0.285632	0.822454	0.00818449	0.0457503
NC_013316	Clostridium_difficile_R20291	Firmicutes	0	0	4191339	0.125187	0.28806	0.822	0.00836382	0.0461366
NC_009089	Clostridium_difficile_630_uid57679	Firmicutes	0	0	4290252	0.124529	0.290605	0.8223	0.00977693	0.0498056
NC_010321	Thermoanaerobacter_pseudethanolicus_ATCC_33223_uid58339	Firmicutes	0	0	2362816	0.123773	0.345128	0.87868	0.0139213	0.059415
NC_013921	Thermoanaerobacter_italicus_Ab9_uid46241	Firmicutes	0	0	2451061	0.121203	0.34145	0.87478	0.0130436	0.0569458
NC_012778	Eubacterium_eligens_ATCC_27750_uid59171	Firmicutes	0	0	2144190	0.121151	0.377127	0.867698	0.0102876	0.0318062
NC_003869	Thermoanaerobacter_tengcongensis_MB4_uid57813	Firmicutes	1.1	0.457	2689445	0.120889	0.375709	0.867027	0.0165165	0.0602473
NC_014209	Thermoanaerobacter_mathranii_A3_uid49481	Firmicutes	0	0	2306092	0.120595	0.343201	0.877144	0.0134178	0.0574442
NC_010320	Thermoanaerobacter_X514_uid58589	Firmicutes	0	0	2457259	0.120219	0.345187	0.873935	0.0134085	0.0562427
NC_007530	Bacillus_anthracis__Ames_Ancestor__uid58083	Firmicutes	0	0	3918589	0.119485	0.471933	0.75525	0.0152702	0.063421
NC_003030	Clostridium_acetobutylicum_ATCC_824_uid57677	Firmicutes	0.58	0.838	3940880	0.118565	0.309258	0.789975	0.00901608	0.0405295
NC_009922	Alkaliphilus_oremlandii_OhILAs_uid58495	Firmicutes	0	0	3123558	0.116954	0.362573	0.859661	0.0109894	0.0473843
NC_009633	Alkaliphilus_metalliredigens_QYMF_uid58171	Firmicutes	0	0	4929566	0.116367	0.36822	0.85968	0.0142809	0.0575469
NC_012781	Eubacterium_rectale_ATCC_33656_uid59169	Firmicutes	0	0	3449685	0.116014	0.414812	0.824813	0.0161451	0.0472883
NC_010376	Finegoldia_magna_ATCC_29328_uid58867	Firmicutes	0	0	1797577	0.112904	0.323128	0.838037	0.0152671	0.0806313
NC_009706	Clostridium_kluyveri_DSM_555_uid58885	Firmicutes	0	0	3964618	0.100951	0.320204	0.764338	0.0132942	0.0470792
NC_011837	Clostridium_kluyveri_NBRC_12016_uid59369	Firmicutes	0	0	3896121	0.100083	0.319936	0.766013	0.0116185	0.0440175
NC_012034	Caldicellulosiruptor_bescii_DSM_6725_uid59201	Firmicutes	0	0	2919718	0.0980485	0.351725	0.817188	0.0189303	0.0510191
NC_009012	Clostridium_thermocellum_ATCC_27405_uid57917	Firmicutes	0	0	3843301	0.0971714	0.389866	0.803325	0.0106014	0.0461096
NC_011898	Clostridium_cellulolyticum_H10_uid58709	Firmicutes	0	0	4068724	0.0966101	0.37404	0.827014	0.0123319	0.0514241
NC_007929	Lactobacillus_salivarius_UCC118_uid58233	Firmicutes	0	0	1827111	0.0953434	0.329412	0.809913	0.011089	0.0552447
NC_009437	Caldicellulosiruptor_saccharolyticus_DSM_8903_uid58289	Firmicutes	0	0	2970275	0.0944892	0.352541	0.811497	0.0176598	0.0471459
NC_004722	Bacillus_cereus_ATCC_14579_uid57975	Firmicutes	0.3	0	5411809	0.0910219	0.352806	0.752914	0.0138275	0.0608567
NC_011899	Halothermothrix_orenii_H_168_uid58585	Firmicutes	0	0	2578146	0.090797	0.378832	0.890692	0.0119734	0.0555999
NC_010184	Bacillus_weihenstephanensis_KBAB4_uid58315	Firmicutes	0	0	5262775	0.0905752	0.355616	0.742968	0.0133068	0.0597707
NC_012472	Bacillus_cereus_03BB102_uid59299	Firmicutes	0	0	5228663	0.0905134	0.357182	0.742297	0.0142924	0.0626716
NC_011725	Bacillus_cereus_B4264_uid58757	Firmicutes	0	0	5419036	0.090333	0.353036	0.746017	0.014562	0.0614266
NC_011773	Bacillus_cereus_AH820_uid58751	Firmicutes	0	0	5302683	0.0902669	0.353985	0.747624	0.0143447	0.0642277
NC_010001	Clostridium_phytofermentans_ISDg_uid58519	Firmicutes	0	0	4847594	0.0900818	0.353485	0.818508	0.010224	0.0424276
NC_003909	Bacillus_cereus_ATCC_10987_uid57673	Firmicutes	0	0	5224283	0.0898766	0.355762	0.734464	0.0165977	0.0646094
NC_011772	Bacillus_cereus_G9842_uid58759	Firmicutes	0	0	5387334	0.0898637	0.352643	0.749727	0.0144306	0.0630169
NC_012581	Bacillus_anthracis_CDC_684_uid59303	Firmicutes	0	0	5230115	0.0896758	0.353808	0.748431	0.0148399	0.0670677
NC_014171	Bacillus_thuringiensis_BMB171_uid49135	Firmicutes	0	0	5330088	0.0896582	0.352884	0.746948	0.0152945	0.0621746
NC_012659	Bacillus_anthracis_A0248_uid59385	Firmicutes	0	0	5227419	0.0895683	0.353772	0.74871	0.0143248	0.0642235
NC_003997	Bacillus_anthracis_Ames_uid57909	Firmicutes	0	2.045	5227293	0.0895636	0.353768	0.746902	0.0150872	0.0641611
NC_011969	Bacillus_cereus_Q1_uid58529	Firmicutes	0	0	5214195	0.0891472	0.355624	0.749181	0.0147358	0.0613679
NC_005957	Bacillus_thuringiensis_serovar_konkukian_97_27_uid58089	Firmicutes	0	0	5237682	0.0890251	0.354053	0.7457	0.0135412	0.0585739
NC_011658	Bacillus_cereus_AH187_uid58753	Firmicutes	0	0	5269030	0.0889454	0.355912	0.747326	0.0149857	0.0655035
NC_008600	Bacillus_thuringiensis_Al_Hakam_uid58795	Firmicutes	0	0	5257091	0.0887455	0.354261	0.746568	0.012933	0.0508071
NC_006274	Bacillus_cereus_E33L_uid58103	Firmicutes	0	0	5300915	0.0886913	0.353519	0.744789	0.013592	0.057909
NC_009674	Bacillus_cytotoxicus_NVH_391_98_uid58317	Firmicutes	0	0	4087024	0.0875664	0.358768	0.749739	0.0129891	0.0653521
NC_007503	Carboxydothermus_hydrogenoformans_Z_2901_uid57821	Firmicutes	0	0	2401520	0.0852914	0.420497	0.869034	0.0188103	0.0610021
NC_009641	Staphylococcus_aureus_Newman_uid58839	Firmicutes	0	0	2878897	0.0809911	0.328883	0.769613	0.0144879	0.0860157
NC_007795	Staphylococcus_aureus_NCTC_8325_uid57795	Firmicutes	0	0	2821361	0.0797409	0.328683	0.757523	0.0194317	0.0955791
NC_003923	Staphylococcus_aureus_MW2_uid57903	Firmicutes	0	0	2820462	0.0788062	0.328296	0.760961	0.0151158	0.0903668
NC_009632	Staphylococcus_aureus_JH1_uid58457	Firmicutes	0	0	2906507	0.0787244	0.329507	0.76102	0.0148328	0.0864033
NC_009487	Staphylococcus_aureus_JH9_uid58455	Firmicutes	0	0	2906700	0.0786287	0.329494	0.763724	0.0144104	0.085677
NC_002953	Staphylococcus_aureus_MSSA476_uid57841	Firmicutes	0	0	2799802	0.0783448	0.328504	0.759439	0.0149872	0.0878456
NC_007793	Staphylococcus_aureus_USA300_FPR3757_uid58555	Firmicutes	0	0	2872769	0.0780769	0.32751	0.767097	0.0139226	0.0837061
NC_010718	Natranaerobius_thermophilus_JW_NM_WN_LF_uid59001	Firmicutes	0	0	3165557	0.0778893	0.363223	0.80569	0.0145472	0.0728861
NC_002951	Staphylococcus_aureus_COL_uid57797	Firmicutes	0	0	2809422	0.0778473	0.328175	0.763894	0.0164403	0.0901069
NC_003212	Listeria_innocua	Firmicutes	0.6	0	3011208	0.0778146	0.37439	0.802224	0.0220356	0.103002
NC_010079	Staphylococcus_aureus_USA300_TCH1516_uid58925	Firmicutes	0	0	2872915	0.077083	0.327563	0.754518	0.0174091	0.0904126
NC_013891	Listeria_seeligeri_serovar_1_2b_SLCC3954_uid46215	Firmicutes	0	0	2797636	0.0770179	0.373826	0.794096	0.0217799	0.0970152
NC_011999	Macrococcus_caseolyticus_JCSC5402_uid59003	Firmicutes	0	0	2102324	0.0769558	0.368769	0.787583	0.0124524	0.0577214
NC_011660	Listeria_monocytogenes_HCC23_uid59203	Firmicutes	0	0	2976212	0.0765214	0.381937	0.792872	0.0252225	0.0975701
NC_004668	Enterococcus_faecalis_V583_uid57669	Firmicutes	0.5	1.84	3218031	0.0765179	0.375274	0.805529	0.0177451	0.0986464
NC_008555	Listeria_welshimeri_serovar_6b_SLCC5334	Firmicutes	0	0	2814130	0.0764059	0.36352	0.7938	0.0191667	0.0916627
NC_013450	Staphylococcus_aureus_ED98	Firmicutes	0	0	2824404	0.0762731	0.328376	0.751128	0.0144565	0.089894
NC_013766	Listeria_monocytogenes_uid43671	Firmicutes	0	1.198	3032288	0.0761907	0.379551	0.794616	0.023322	0.095422
NC_002745	Staphylococcus_aureus_N315_uid57837	Firmicutes	0.4	1.564	2814816	0.0760803	0.328435	0.748257	0.0138054	0.0850978
NC_009782	Staphylococcus_aureus_Mu3_uid58817	Firmicutes	0	0	2880168	0.0757824	0.328777	0.744143	0.0147451	0.0874942
NC_002758	Staphylococcus_aureus_Mu50_uid57835	Firmicutes	0	0	2878529	0.075639	0.328778	0.744341	0.0149993	0.087067
NC_007622	Staphylococcus_aureus_RF122_uid57661	Firmicutes	0	0	2742531	0.0754912	0.327787	0.755981	0.0139008	0.0844898
NC_013768	Listeria_monocytogenes_08_5923_uid43727	Firmicutes	0	0	2999054	0.0754745	0.37965	0.79258	0.0233953	0.095236
NC_014220	Syntrophothermus_lipocalidus_DSM_12680_uid49527	Firmicutes	0	0	2405559	0.0749169	0.509894	0.80225	0.0189965	0.0379766
NC_002973	Listeria_monocytogenes_serotype_4b_F2365_uid57689	Firmicutes	0	0	2905187	0.0740183	0.380412	0.790706	0.0245377	0.100665
NC_002952	Staphylococcus_aureus_MRSA252_uid57839	Firmicutes	0	0	2902619	0.0739694	0.328072	0.747452	0.0156402	0.0872574
NC_012488	Listeria_monocytogenes_Clip80459_uid59317	Firmicutes	0	0	2912690	0.073896	0.380623	0.790597	0.0234523	0.0994424
NC_003210	Listeria_monocytogenes	Firmicutes	1	0	2944528	0.0734569	0.37981	0.788752	0.0233599	0.0969082
NC_014152	Thermincola_JR_uid48823	Firmicutes	0	0	3157416	0.0729983	0.458825	0.866305	0.0147263	0.0588427
NC_007350	Staphylococcus_saprophyticus_ATCC_15305_uid58411	Firmicutes	0	0	2516575	0.0729607	0.332399	0.737014	0.0146697	0.0940657
NC_004193	Oceanobacillus_iheyensis_HTE831_uid57867	Firmicutes	0	1.301	3630528	0.0718182	0.356813	0.753072	0.0128215	0.0704197
NC_008525	Pediococcus_pentosaceus_ATCC_25745_uid57981	Firmicutes	0	0	1832387	0.0702303	0.373578	0.793732	0.0137228	0.0699771
NC_012121	Staphylococcus_carnosus_TM300_uid59401	Firmicutes	0	0	2566424	0.0695867	0.346327	0.746341	0.0164468	0.0992076
NC_014019	Bacillus_megaterium_QM_B1551_uid15862	Firmicutes	0	0	5097129	0.0686063	0.382568	0.754595	0.0154474	0.0988901
NC_013791	Bacillus_pseudofirmus_OF4_uid45847	Firmicutes	0	0	3858997	0.0680791	0.402674	0.777863	0.0176981	0.0816801
NC_014103	Bacillus_megaterium_DSM319_uid48371	Firmicutes	0	0	5097447	0.0680182	0.381316	0.748725	0.0150221	0.0982827
NC_011567	Anoxybacillus_flavithermus_WK1_uid59135	Firmicutes	0	0	2846746	0.0665602	0.417768	0.784882	0.0173361	0.0892811
NC_005362	Lactobacillus_johnsonii_NCC_533_uid58029	Firmicutes	0.9	0	1992676	0.0661131	0.346112	0.77967	0.0125643	0.0713429
NC_012793	Geobacillus_WCH70_uid59045	Firmicutes	0	0	3464618	0.0661066	0.428396	0.784458	0.0186281	0.0921914
NC_004461	Staphylococcus_epidermidis_ATCC_12228_uid57861	Firmicutes	0.8	0	2499279	0.0660675	0.320952	0.735318	0.0201842	0.103799
NC_009848	Bacillus_pumilus_SAFR_032_uid59017	Firmicutes	0	0	3704465	0.0657048	0.412869	0.749252	0.0200495	0.106546
NC_013171	Anaerococcus_prevotii_DSM_20548_uid59219	Firmicutes	0	0	2919718	0.064871	0.232625	0.840588	0.0205824	0.0980976
NC_013893	Staphylococcus_lugdunensis_HKU09_01_uid46233	Firmicutes	0	0	2658366	0.0648699	0.338681	0.743672	0.0187424	0.121705
NC_007168	Staphylococcus_haemolyticus	Firmicutes	0	0	2685015	0.0647792	0.327926	0.73757	0.0197493	0.112377
NC_013740	Acidaminococcus_fermentans_DSM_20731_uid43471	Firmicutes	0	0	2329769	0.0636874	0.558427	0.84	0.036345	0.0868352
NC_009253	Desulfotomaculum_reducens_MI_1_uid58277	Firmicutes	0	0	3608104	0.0634682	0.422753	0.799389	0.0201428	0.0597723
NC_013504	Lactobacillus_johnsonii_FI9785	Firmicutes	0	0	1755993	0.0631079	0.344857	0.773552	0.0129742	0.0769176
NC_014219	Bacillus_selenitireducens_MLS10_uid49513	Firmicutes	0	0	3592487	0.0630418	0.4867	0.764688	0.0171695	0.0629643
NC_008530	Lactobacillus_gasseri_ATCC_33323_uid57687	Firmicutes	0	0	1894360	0.0625309	0.352596	0.777208	0.0120669	0.069432
NC_002570	Bacillus_halodurans_C_125_uid57791	Firmicutes	0.6	0.999	4202352	0.0620843	0.436855	0.773868	0.0173607	0.0804058
NC_002976	Staphylococcus_epidermidis_RP62A_uid57663	Firmicutes	0	1.164	2616530	0.0616244	0.321514	0.730229	0.0203029	0.107596
NC_008346	Syntrophomonas_wolfei_Goettingen_uid58179	Firmicutes	0	0	2936195	0.0614418	0.448659	0.787855	0.0199766	0.0531331
NC_012491	Brevibacillus_brevis_NBRC_100599_uid59175	Firmicutes	0	0	6296436	0.0614163	0.472736	0.743861	0.0202267	0.0702326
NC_014319	Leuconostoc_gasicomitatum_LMG_18811_uid50385	Firmicutes	0	0	1954080	0.0609586	0.366632	0.826792	0.0146938	0.0781783
NC_000964	Bacillus_subtilis_168_uid57675	Firmicutes	0.43	1.36	4214630	0.0600632	0.435245	0.737953	0.0175368	0.0961586
NC_008531	Leuconostoc_mesenteroides_ATCC_8293_uid57919	Firmicutes	0	0	2038396	0.0597038	0.377103	0.830457	0.0150764	0.0776461
NC_010382	Lysinibacillus_sphaericus_C3_41_uid58945	Firmicutes	0	0	4639821	0.0596836	0.372893	0.739092	0.018058	0.0701552
NC_013656	Lactococcus_lactis_KF147	Firmicutes	0	2.288	2598144	0.0596018	0.349103	0.819075	0.0228411	0.107134
NC_014136	Leuconostoc_kimchii_IMSNU_11154_uid48589	Firmicutes	0	0	2002721	0.0594826	0.379996	0.827246	0.0148758	0.0737693
NC_009328	Geobacillus_thermodenitrificans_NG80_2_uid58829	Firmicutes	0	0	3550319	0.0588063	0.490097	0.793927	0.0170481	0.0789451
NC_006322	Bacillus_licheniformis_ATCC_14580_uid58199	Firmicutes	0	0	4222645	0.0580828	0.461947	0.745945	0.018421	0.110565
NC_002662	Lactococcus_lactis_Il1403_uid57671	Firmicutes	0.7	0	2365589	0.0578955	0.353294	0.809914	0.0237392	0.107379
NC_006270	Bacillus_licheniformis_ATCC_14580_uid58097	Firmicutes	0.58	0	4222334	0.0578952	0.461973	0.745686	0.0197617	0.115354
NC_007576	Lactobacillus_sakei_23K_uid58281	Firmicutes	0	0	1884661	0.057595	0.412576	0.769968	0.0222665	0.101951
NC_006510	Geobacillus_kaustophilus_HTA426_uid58227	Firmicutes	0	0	3544776	0.0575444	0.520862	0.78982	0.0222968	0.0882173
NC_008527	Lactococcus_lactis_cremoris_SK11_uid57983	Firmicutes	0	0	2438589	0.0571622	0.358557	0.794796	0.0274407	0.120935
NC_009004	Lactococcus_lactis_cremoris_MG1363_uid58837	Firmicutes	0	0	2529478	0.0566528	0.357456	0.799671	0.0237206	0.111503
NC_006814	Lactobacillus_acidophilus_NCFM_uid57685	Firmicutes	1.8	0	1993564	0.056557	0.347145	0.76824	0.0136478	0.0634364
NC_014206	Geobacillus_C56_T3_uid49467	Firmicutes	0	0	3650813	0.0556405	0.524942	0.802957	0.0197073	0.0837671
NC_013411	Geobacillus_Y412MC61	Firmicutes	0	0	3622844	0.0554294	0.52422	0.786197	0.0201252	0.0831151
NC_010556	Exiguobacterium_sibiricum_255_15_uid58053	Firmicutes	0	0	3034136	0.054751	0.477183	0.706	0.02104	0.0972617
NC_014106	Lactobacillus_crispatus_ST1_uid48359	Firmicutes	0	0	2043161	0.0545243	0.368776	0.767177	0.0125994	0.0678181
NC_013406	Geobacillus_Y412MC10	Firmicutes	0	0	7121665	0.0543728	0.512395	0.770957	0.0184248	0.0564156
NC_006582	Bacillus_clausii_KSM_K16_uid58237	Firmicutes	0	0	4303871	0.0542402	0.447533	0.758486	0.0178022	0.0992906
NC_009513	Lactobacillus_reuteri_DSM_20016_uid58471	Firmicutes	0	0	1999618	0.0535542	0.388726	0.770405	0.0164426	0.0837042
NC_009454	Pelotomaculum_thermopropionicum_SI_uid58877	Firmicutes	0	0	3025375	0.0534549	0.529611	0.785739	0.0278657	0.0523971
NC_010471	Leuconostoc_citreum_KM20_uid58481	Firmicutes	0	0	1796284	0.0534002	0.389891	0.838425	0.013945	0.0740156
NC_010609	Lactobacillus_reuteri_JCM_1112_uid58875	Firmicutes	0	0	2039414	0.0531506	0.388788	0.770627	0.0145034	0.0771661
NC_004368	Streptococcus_agalactiae_NEM316	Firmicutes	0	0	2211485	0.0526691	0.356274	0.816619	0.0181912	0.0897434
NC_012673	Exiguobacterium_AT1b_uid59093	Firmicutes	0	0	2999895	0.0522382	0.484626	0.73998	0.0242381	0.082727
NC_008497	Lactobacillus_brevis_ATCC_367_uid57989	Firmicutes	0	0	2291220	0.0519976	0.462189	0.746795	0.0172565	0.0659076
NC_011830	Desulfitobacterium_hafniense_DCB_2_uid57749	Firmicutes	0	0	5279134	0.0509686	0.475373	0.802297	0.0264187	0.0675942
NC_004116	Streptococcus_agalactiae_2603V_R_uid57943	Firmicutes	1.8	1.504	2160267	0.0507525	0.356466	0.802167	0.022034	0.0931215
NC_011134	Streptococcus_equi_zooepidemicus_MGCS10565_uid59263	Firmicutes	0	0	2024171	0.0507195	0.418397	0.797569	0.021994	0.0875376
NC_007907	Desulfitobacterium_hafniense_Y51_uid58605	Firmicutes	0	0	5727534	0.0505764	0.473599	0.789442	0.0251652	0.065114
NC_004070	Streptococcus_pyogenes_MGAS315_uid57911	Firmicutes	0	0	1900521	0.0499837	0.385927	0.812768	0.0257179	0.116802
NC_013520	Veillonella_parvula_DSM_2008	Firmicutes	0	0	2132142	0.0498982	0.386293	0.883279	0.0132979	0.0587946
NC_004606	Streptococcus_pyogenes_SSI_1_uid57895	Firmicutes	0	0	1894275	0.0497726	0.385503	0.810549	0.02576	0.120041
NC_013853	Streptococcus_mitis_B6_uid46097	Firmicutes	0	0	2146611	0.0497123	0.399792	0.785714	0.0247668	0.0982844
NC_013216	Desulfotomaculum_acetoxidans_DSM_771_uid59109	Firmicutes	0	0	4545624	0.0496733	0.415548	0.750989	0.0190159	0.0576204
NC_007432	Streptococcus_agalactiae_A909_uid57935	Firmicutes	0	0	2127839	0.0496198	0.356224	0.804915	0.0199186	0.0873809
NC_007296	Streptococcus_pyogenes_MGAS6180_uid58335	Firmicutes	0	0	1897573	0.0488197	0.383532	0.790808	0.0276577	0.121686
NC_009785	Streptococcus_gordonii_Challis_substr__CH1_uid57667	Firmicutes	0	0	2196662	0.048774	0.405068	0.819424	0.0200706	0.0898662
NC_008023	Streptococcus_pyogenes_MGAS2096_uid58573	Firmicutes	0	0	1860355	0.048745	0.387292	0.791776	0.0263624	0.106276
NC_003485	Streptococcus_pyogenes_MGAS8232_uid57871	Firmicutes	0	0	1895017	0.0487283	0.385466	0.803591	0.0246294	0.118603
NC_011295	Coprothermobacter_proteolyticus_DSM_5265_uid59253	Firmicutes	0	0	1424912	0.0482191	0.447701	0.673194	0.0191514	0.0591786
NC_004567	Lactobacillus_plantarum	Firmicutes	1.6	1.253	3308274	0.0481435	0.444667	0.73686	0.0156458	0.0605268
NC_012470	Streptococcus_equi_zooepidemicus_uid59261	Firmicutes	0	0	2149868	0.0480895	0.415324	0.818328	0.0201545	0.0827484
NC_012984	Lactobacillus_plantarum_JDM1_uid59361	Firmicutes	0	1.253	3197759	0.0480787	0.446609	0.736003	0.0153958	0.0606276
NC_012466	Streptococcus_pneumoniae_JJA_uid59121	Firmicutes	0	0	2120234	0.0480551	0.397438	0.789449	0.0267947	0.103384
NC_011900	Streptococcus_pneumoniae_ATCC_700669_uid59287	Firmicutes	0	0	2221315	0.0479	0.394886	0.81206	0.0241276	0.0941077
NC_008022	Streptococcus_pyogenes_MGAS10270_uid58571	Firmicutes	0	0	1928252	0.0477479	0.384299	0.784887	0.0268906	0.11543
NC_008021	Streptococcus_pyogenes_MGAS9429_uid58569	Firmicutes	0	0	1836467	0.0477248	0.38538	0.78838	0.0264935	0.11115
NC_008054	Lactobacillus_delbrueckii_bulgaricus_ATCC_11842_uid58647	Firmicutes	0	0	1864998	0.0475164	0.49719	0.784173	0.0528646	0.146036
NC_006086	Streptococcus_pyogenes_MGAS10394_uid58105	Firmicutes	0	0	1899877	0.0474436	0.386851	0.786207	0.0267348	0.116369
NC_011072	Streptococcus_pneumoniae_G54_uid59167	Firmicutes	0	0	2078953	0.0474051	0.396375	0.800378	0.0285313	0.10834
NC_012926	Streptococcus_suis_BM407_uid59321	Firmicutes	0	0	2146229	0.0473868	0.410648	0.806736	0.0245759	0.0852073
NC_010380	Streptococcus_pneumoniae_Hungary19A_6_uid59117	Firmicutes	0	0	2245615	0.0473572	0.396309	0.807799	0.0273062	0.10596
NC_012924	Streptococcus_suis_SC84_uid59323	Firmicutes	0	0	2095898	0.047322	0.411068	0.810554	0.0244543	0.0839239
NC_009442	Streptococcus_suis_05ZYH33_uid58663	Firmicutes	0	0	2096309	0.0471844	0.411097	0.803114	0.0282633	0.0830422
NC_010080	Lactobacillus_helveticus_DPC_4571_uid58761	Firmicutes	0	0	2080931	0.0471755	0.37077	0.763207	0.0165036	0.0651434
NC_012925	Streptococcus_suis_P1_7	Firmicutes	0	0	2007491	0.0471529	0.412995	0.807798	0.0248327	0.0813857
NC_009443	Streptococcus_suis_98HAH33_uid58665	Firmicutes	0	0	2095698	0.0471404	0.411134	0.799817	0.0274369	0.0813811
NC_008533	Streptococcus_pneumoniae_D39_uid58581	Firmicutes	0	0	2046115	0.0470389	0.39706	0.811814	0.0255203	0.096533
NC_009332	Streptococcus_pyogenes_Manfredo_uid57847	Firmicutes	0	0	1841271	0.0470333	0.386285	0.799771	0.0242851	0.120244
NC_012467	Streptococcus_pneumoniae_P1031_uid59123	Firmicutes	0	0	2111882	0.0469212	0.397458	0.797395	0.0275682	0.102502
NC_003098	Streptococcus_pneumoniae_R6_uid57859	Firmicutes	0	1.72	2038615	0.0468647	0.39716	0.790789	0.0253827	0.0964424
NC_012468	Streptococcus_pneumoniae_70585_uid59125	Firmicutes	0	0	2184682	0.0468105	0.397256	0.802906	0.0300752	0.0996161
NC_010582	Streptococcus_pneumoniae_CGSP14_uid59181	Firmicutes	0	0	2209198	0.0465698	0.394622	0.793291	0.0286769	0.103619
NC_003028	Streptococcus_pneumoniae_TIGR4_uid57857	Firmicutes	0.5	0	2160837	0.0462987	0.396973	0.802281	0.0299112	0.106502
NC_008529	Lactobacillus_delbrueckii_bulgaricus_ATCC_BAA_365_uid57987	Firmicutes	0	0	1856951	0.0462872	0.496863	0.763848	0.0561899	0.15486
NC_007297	Streptococcus_pyogenes_MGAS5005_uid58337	Firmicutes	0	0	1838554	0.0462809	0.385344	0.793991	0.0285771	0.113703
NC_002737	Streptococcus_pyogenes_M1_GAS_uid57845	Firmicutes	0.4	1.759	1852441	0.0458266	0.385135	0.79764	0.02359	0.112931
NC_011375	Streptococcus_pyogenes_NZ131_uid59035	Firmicutes	0	0	1815785	0.0457103	0.385686	0.789288	0.024236	0.119428
NC_012004	Streptococcus_uberis_0140J_uid57959	Firmicutes	0	0	1852352	0.0452074	0.366318	0.80216	0.0238014	0.109064
NC_009009	Streptococcus_sanguinis_SK36_uid58381	Firmicutes	0	0	2388435	0.0450416	0.434002	0.833333	0.0208966	0.0875144
NC_013798	Streptococcus_gallolyticus_UCN34_uid46061	Firmicutes	0	0	2350911	0.0450306	0.376361	0.830783	0.0217959	0.0926756
NC_014251	Streptococcus_pneumoniae_TCH8431_19A_uid49735	Firmicutes	0	0	2088772	0.0448991	0.398354	0.755165	0.0303641	0.114451
NC_013385	Ammonifex_degensii_KC4	Firmicutes	0	0	2129237	0.0447921	0.594484	0.819912	0.0371689	0.0522384
NC_012469	Streptococcus_pneumoniae_Taiwan19F_14_uid59119	Firmicutes	0	0	2112148	0.0445755	0.39767	0.771526	0.027192	0.108735
NC_012471	Streptococcus_equi_4047_uid59259	Firmicutes	0	0	2253793	0.0440755	0.412825	0.803902	0.019421	0.0954354
NC_009725	Bacillus_amyloliquefaciens_FZB42_uid58271	Firmicutes	0	0	5365318	0.043904	0.339437	0.744652	0.0184067	0.103972
NC_013895	Clostridiales_genomosp__BVAB3_UPII9_5_uid46219	Firmicutes	0	0	1810248	0.0430162	0.441991	0.711821	0.0255845	0.0892184
NC_014098	Bacillus_tusciae_DSM_2912_uid48361	Firmicutes	0	0	5262775	0.0421325	0.380194	0.755407	0.024045	0.0306517
NC_012891	Streptococcus_dysgalactiae_equisimilis_GGS_124_uid59103	Firmicutes	0	0	2106340	0.0421148	0.395771	0.791308	0.0271237	0.128872
NC_008024	Streptococcus_pyogenes_MGAS10750_uid58575	Firmicutes	0	0	1937111	0.0419589	0.383159	0.773003	0.0276029	0.117734
NC_013928	Streptococcus_mutans_NN2025_uid46353	Firmicutes	0	0	2013587	0.0416635	0.368466	0.818902	0.0183381	0.0926275
NC_006448	Streptococcus_thermophilus_LMG_18311_uid58219	Firmicutes	0.43	0	1796846	0.0411365	0.390917	0.79661	0.0283072	0.10453
NC_010424	Candidatus_Desulforudis_audaxviator_MP104C_uid59067	Firmicutes	0	0	2349476	0.0408355	0.608471	0.815399	0.0282078	0.0442728
NC_010610	Lactobacillus_fermentum_IFO_3956_uid58865	Firmicutes	0	0	2098685	0.0408065	0.51469	0.736013	0.0696248	0.188668
NC_008532	Streptococcus_thermophilus_LMD_9_uid58327	Firmicutes	0	0	1856368	0.0403433	0.390812	0.816159	0.0290903	0.105216
NC_006449	Streptococcus_thermophilus_CNRZ1066_uid58221	Firmicutes	0	0	1796226	0.0402255	0.390814	0.793103	0.0286418	0.103479
NC_004350	Streptococcus_mutans_UA159_uid57947	Firmicutes	0.75	0	2030921	0.0394082	0.36825	0.803982	0.0202887	0.0977909
NC_013205	Alicyclobacillus_acidocaldarius_DSM_446_uid59199	Firmicutes	0	0	3018755	0.0393934	0.623346	0.787942	0.0351438	0.0510677
NC_008528	Oenococcus_oeni_PSU_1_uid59417	Firmicutes	0	0	1780517	0.0388061	0.378889	0.747188	0.0188857	0.126833
NC_013198	Lactobacillus_rhamnosus_GG_uid59313	Firmicutes	0	0	3010111	0.0378448	0.4669	0.696668	0.0330091	0.0928726
NC_010999	Lactobacillus_casei_BL23_uid59237	Firmicutes	0	0	3079196	0.0345226	0.463357	0.715328	0.0246451	0.103376
NC_008526	Lactobacillus_casei_ATCC_334_uid57985	Firmicutes	0	0	2895264	0.0335721	0.466195	0.711685	0.0257274	0.101663
NC_010337	Heliobacterium_modesticaldum_Ice1_uid58279	Firmicutes	0	0	3075407	0.0316612	0.569752	0.753918	0.117524	0.194261
NC_007644	Moorella_thermoacetica_ATCC_39073_uid58051	Firmicutes	0	0	2628784	0.0313103	0.557915	0.816409	0.0522428	0.100117
NC_006177	Symbiobacterium_thermophilum_IAM_14863_uid58165	Firmicutes	4.2	0	3566135	0.0296879	0.686684	0.728199	0.0475754	0.0489528
NC_005945	Bacillus_anthracis_Sterne_uid58091	Firmicutes	0	0	5228663	0.0212683	0.353794	0.568268	0.02847	0.0743347
NC_013515	Streptobacillus_moniliformis_DSM_12112	Fusobacteria	0	0	1662578	0.147117	0.263146	0.859441	0.00843559	0.05511
NC_013517	Sebaldella_termitidis_ATCC_33386	Fusobacteria	0	0	4418842	0.133938	0.334516	0.767328	0.00809578	0.0456325
NC_013192	Leptotrichia_buccalis_C_1013_b_uid59211	Fusobacteria	0	0	2465610	0.0731389	0.296457	0.678878	0.0132974	0.0461199
NC_003454	Fusobacterium_nucleatum_ATCC_25586_uid57885	Fusobacteria	0.72	1.244	2174500	0.044533	0.271516	0.587979	0.0120268	0.0769436
NC_012489	Gemmatimonas_aurantiaca_T_27_uid58813	Gemmatimonadetes	0	0	4636964	0.0208568	0.642744	0.566455	0.0430676	0.0556117
NC_011296	Thermodesulfovibrio_yellowstonii_DSM_11347_uid59257	Nitrospirae	0	0	2003803	0.0134449	0.341289	0.552386	0.0191406	0.0754803
NC_005027	Pirellula_sp	Planctomycetes	10	0	7145576	0.0369602	0.554033	0.489007	0.0684782	0.094848
NC_014148	Planctomyces_limnophilus_DSM_3776_uid48643	Planctomycetes	0	0	5423075	0.0179944	0.536616	0.502383	0.104033	0.085386
NC_013720	Pirellula_staleyi_DSM_6068_uid43209	Planctomycetes	0	0	6196199	0.0142899	0.574647	0.515062	0.175863	0.235179
NC_010513	Xylella_fastidiosa_M12_uid58763	Proteobacteria	0	0	2475130	0.113139	0.519175	0.587732	0.0613029	0.0654462
NC_004556	Xylella_fastidiosa_Temecula1_uid57869	Proteobacteria	0	-0.781	2519802	0.111333	0.517764	0.575504	0.0660089	0.0692465
NC_007354	Ehrlichia_canis_Jake_uid58071	Proteobacteria	0	0	1315030	0.110343	0.289577	0.576216	0.00738813	0.045592
NC_010577	Xylella_fastidiosa_M23_uid58809	Proteobacteria	0	0	2535690	0.109438	0.517568	0.59213	0.0680936	0.0716423
NC_007799	Ehrlichia_chaffeensis_Arkansas_uid57933	Proteobacteria	0	0	1176248	0.107061	0.301007	0.57337	0.0128354	0.0651681
NC_006832	Ehrlichia_ruminantium_Welgevonden_uid58243	Proteobacteria	0	0	1512977	0.104162	0.274789	0.529781	0.0110576	0.0483005
NC_005295	Ehrlichia_ruminantium_Welgevonden_uid58013	Proteobacteria	0	0	1516355	0.104115	0.274788	0.529345	0.00945934	0.0466431
NC_006831	Ehrlichia_ruminantium_Gardel_uid58245	Proteobacteria	0	0	1499920	0.103994	0.275126	0.530032	0.0104802	0.0501735
NC_002488	Xylella_fastidiosa_9a5c_uid57849	Proteobacteria	96	0	2679306	0.102437	0.526741	0.584087	0.0856036	0.0859738
NC_005061	Candidatus_Blochmannia_floridanus_uid57999	Proteobacteria	36	0	705557	0.0923767	0.273832	0.64716	0.0156392	0.0365729
NC_004545	Buchnera_aphidicola_Bp__Baizongia_pistaciae__uid57827	Proteobacteria	0	-0.59	615980	0.0909543	0.253414	0.572565	0.0100406	0.0754778
NC_005955	Bartonella_quintana_Toulouse_uid57635	Proteobacteria	3	0	1581384	0.0793558	0.387968	0.57807	0.0142358	0.0606648
NC_013009	Neorickettsia_risticii_Illinois_uid58889	Proteobacteria	0	0	879977	0.0786168	0.412713	0.594837	0.0204598	0.0720394
NC_008260	Alcanivorax_borkumensis_SK2_uid58169	Proteobacteria	0	0	3120143	0.0773346	0.547278	0.601162	0.0194274	0.0431312
NC_005956	Bartonella_henselae_Houston_1_uid57745	Proteobacteria	3	0	1931047	0.0768883	0.382303	0.581427	0.0167948	0.0732999
NC_007798	Neorickettsia_sennetsu_Miyayama_uid57965	Proteobacteria	0	0	859006	0.0762276	0.410843	0.596774	0.0240447	0.0854693
NC_008783	Bartonella_bacilliformis_KC583_uid58533	Proteobacteria	0	0	1445021	0.075875	0.382387	0.615925	0.0215282	0.0668102
NC_006138	Desulfotalea_psychrophila_LSv54_uid58153	Proteobacteria	0.37	0	3523383	0.0751724	0.468112	0.539153	0.0319836	0.0781959
NC_010161	Bartonella_tribocorum_CIP_105476_uid59129	Proteobacteria	0	0	2619061	0.0690098	0.388561	0.596228	0.025075	0.071506
NC_008513	Buchnera_aphidicola_Cc__Cinara_cedri__uid58579	Proteobacteria	0	0	416380	0.0687017	0.20097	0.584046	0.0170333	0.161443
NC_009654	Marinomonas_MWYL1_uid58715	Proteobacteria	0	0	5100344	0.0677146	0.425941	0.606443	0.018598	0.0690322
NC_009465	Candidatus_Vesicomyosocius_okutanii_HA_uid59427	Proteobacteria	0	0	1022154	0.0672873	0.315949	0.588235	0.0138273	0.0532912
NC_012982	Hirschia_baltica_ATCC_49814_uid59365	Proteobacteria	0	0	3455622	0.0664934	0.452301	0.572987	0.0128485	0.0373471
NC_012846	Bartonella_grahamii_as4aup_uid59405	Proteobacteria	0	0	2341328	0.0647479	0.380572	0.565668	0.0186503	0.0800552
NC_012968	Methylotenera_mobilis_JLW8_uid59373	Proteobacteria	0	0	2547570	0.0600439	0.455102	0.582192	0.0157418	0.0527762
NC_012960	Candidatus_Hodgkinia_cicadicola_Dsem_uid59311	Proteobacteria	0	0	143795	0.0585347	0.583852	0.746988	0.0339462	0.0638503
NC_008390	Burkholderia_ambifaria_AMMD_uid58303	Proteobacteria	0	0	1224595	0.0585083	1.94204	0.612308	0.0534444	0.0996663
NC_010506	Shewanella_woodyi_ATCC_51908_uid58721	Proteobacteria	0	0	5935403	0.0573651	0.43701	0.578407	0.0151354	0.0450107
NC_007520	Thiomicrospira_crunogena_XCL_2_uid58183	Proteobacteria	0	0	2427734	0.0561322	0.4313	0.641294	0.0168249	0.0525945
NC_007797	Anaplasma_phagocytophilum_HZ_uid57951	Proteobacteria	0	0	1471282	0.056113	0.416359	0.598575	0.0266884	0.0578957
NC_014315	Nitrosococcus_watsoni_C_113_uid50331	Proteobacteria	0	0	3328570	0.0556395	0.501175	0.606294	0.0242233	0.060291
NC_012962	Photorhabdus_asymbiotica_uid59243	Proteobacteria	0	0	5064808	0.0551259	0.421526	0.588423	0.0194229	0.0628812
NC_013960	Nitrosococcus_halophilus_Nc4_uid46803	Proteobacteria	0	0	4079427	0.054478	0.51584	0.591481	0.0292666	0.0603052
NC_013949	Helicobacter_mustelae_12198_uid46647	Proteobacteria	0	0	1578097	0.0542951	0.424653	0.609319	0.039301	0.108093
NC_012880	Dickeya_dadantii_Ech703_uid59363	Proteobacteria	0	0	4679450	0.0538341	0.550151	0.575101	0.0196949	0.0506478
NC_007912	Saccharophagus_degradans_2_40_uid57921	Proteobacteria	0	0	5057531	0.0534488	0.458261	0.624158	0.0221829	0.067403
NC_008512	Candidatus_Carsonella_ruddii_uid58773	Proteobacteria	0	0	159662	0.05325	0.165644	0.837079	0.0162316	0.18975
NC_012115	Nautilia_profundicola_AmH_uid59345	Proteobacteria	0	0	1676444	0.0531589	0.335075	0.64893	0.0136653	0.0793083
NC_007484	Nitrosococcus_oceani_ATCC_19707_uid58403	Proteobacteria	0	0	3481691	0.0525851	0.503176	0.619913	0.0256895	0.0569839
NC_012779	Edwardsiella_ictaluri_93_146_uid59403	Proteobacteria	0	0	3812315	0.0525237	0.574367	0.570182	0.0304133	0.0708786
NC_005090	Wolinella_succinogenes	Proteobacteria	1	0	2110355	0.0523301	0.48458	0.599706	0.0324632	0.0753858
NC_013722	Xanthomonas_albilineans	Proteobacteria	0	0	3768695	0.0520358	0.629766	0.574735	0.0454439	0.0765864
NC_008751	Desulfovibrio_vulgaris_DP4_uid58679	Proteobacteria	0	0	3462887	0.0520158	0.630119	0.479769	0.142748	0.163997
NC_010531	Polynucleobacter_necessarius_STIR1_uid58967	Proteobacteria	0	0	1560469	0.0517774	0.455574	0.655172	0.0218867	0.0757577
NC_005126	Photorhabdus_luminescens	Proteobacteria	0.5	0	5688987	0.0516083	0.428254	0.581892	0.0193064	0.0546623
NC_002937	Desulfovibrio_vulgaris_Hildenborough_uid57645	Proteobacteria	14	0	3570858	0.0515602	0.631426	0.48979	0.12068	0.149712
NC_007519	Desulfovibrio_desulfuricans_G20_uid57941	Proteobacteria	0	0	3730232	0.051489	0.578361	0.489018	0.0376424	0.0766572
NC_008011	Lawsonia_intracellularis_PHE_MN1-00	Proteobacteria	0	0	1457619	0.0509976	0.332845	0.512299	0.016824	0.067789
NC_013532	Anaplasma_centrale_Israel	Proteobacteria	0	0	1206806	0.0509444	0.499849	0.584599	0.0161064	0.0365491
NC_010645	Bordetella_avium_197N	Proteobacteria	0	0	3732255	0.0507958	0.615826	0.563372	0.0530513	0.0914477
NC_012026	Anaplasma_marginale_Florida_uid58577	Proteobacteria	0	0	1202435	0.0505915	0.497745	0.574015	0.0194571	0.0392268
NC_008610	Candidatus_Ruthia_magnifica_Cm__Calyptogena_magnifica__uid58645	Proteobacteria	0	0	1160782	0.0505694	0.340334	0.593238	0.0135041	0.0582413
NC_004842	Anaplasma_marginale_Maries_uid57629	Proteobacteria	0	0	1197687	0.0504781	0.497627	0.571278	0.0205741	0.0398271
NC_010995	Cellvibrio_japonicus_Ueda107_uid59139	Proteobacteria	0	0	4576573	0.050382	0.519912	0.613539	0.0412818	0.0867951
NC_013508	Edwardsiella_tarda_EIB202	Proteobacteria	0	0	3760463	0.0503414	0.597344	0.535371	0.0286411	0.0597812
NC_008576	Magnetococcus_MC_1_uid57833	Proteobacteria	0	0	4719581	0.0498644	0.541675	0.601884	0.043571	0.0396021
NC_012997	Teredinibacter_turnerae_T7901_uid59267	Proteobacteria	0	0	5193164	0.0497127	0.508907	0.624971	0.0256451	0.0698758
NC_009662	Nitratiruptor_SB155_2_uid58861	Proteobacteria	0	0	1877931	0.0487105	0.396886	0.653283	0.0212004	0.0773955
NC_007947	Methylobacillus_flagellatus_KT_uid58049	Proteobacteria	0	0	2971517	0.0473681	0.557191	0.568108	0.0306648	0.0570029
NC_009438	Shewanella_putrefaciens_CN_32_uid58267	Proteobacteria	0	0	4659220	0.0472787	0.444516	0.56963	0.0186136	0.0650338
NC_008343	Granulibacter_bethesdensis_CGDNIH1_uid58661	Proteobacteria	0	0	2708355	0.0472305	0.590721	0.569553	0.0243294	0.0409624
NC_006677	Gluconobacter_oxydans_621H_uid58239	Proteobacteria	1	0	2702173	0.0467753	0.610722	0.554504	0.081832	0.0654081
NC_014012	Shewanella_violacea_DSS12_uid47085	Proteobacteria	0	0	4962103	0.0465948	0.447163	0.587572	0.0230601	0.0655284
NC_013592	Dickeya_dadantii_Ech586	Proteobacteria	0	0	4818394	0.046508	0.536391	0.573774	0.0191708	0.0515298
NC_013223	Desulfohalobium_retbaense_DSM_5692_uid59183	Proteobacteria	0	0	2864304	0.046428	0.575401	0.568026	0.0400669	0.0963298
NC_009092	Shewanella_loihica_PV_4_uid58349	Proteobacteria	0	0	4602594	0.046107	0.53667	0.567764	0.0251385	0.0663204
NC_007292	Candidatus_Blochmannia_pennsylvanicus_BPEN_uid58329	Proteobacteria	0	0	791654	0.0458433	0.295647	0.649587	0.0173355	0.0687413
NC_008750	Shewanella_W3_18_1_uid58341	Proteobacteria	0	0	4708380	0.0450597	0.446333	0.579273	0.0205712	0.0701935
NC_007298	Dechloromonas_aromatica_RCB_uid58025	Proteobacteria	0	0	4501104	0.0448765	0.592472	0.549161	0.0705968	0.114757
NC_011662	Thauera_MZ1T_uid58987	Proteobacteria	0	0	2621531	0.0448646	1.17321	0.517652	1.61332	1.87813
NC_012912	Dickeya_zeae_Ech1591_uid59297	Proteobacteria	0	0	4813854	0.044659	0.545173	0.568679	0.0222463	0.0548969
NC_009665	Shewanella_baltica_OS185_uid58743	Proteobacteria	0	0	5229686	0.0445816	0.463125	0.58063	0.021664	0.0696033
NC_011663	Shewanella_baltica_OS223_uid58775	Proteobacteria	0	0	5145902	0.0443429	0.463142	0.571834	0.0228171	0.0744178
NC_013421	Pectobacterium_wasabiae_WPP163	Proteobacteria	0	0	5063892	0.0443141	0.504774	0.571912	0.0188493	0.0553436
NC_009997	Shewanella_baltica_OS195_uid58261	Proteobacteria	0	0	5347283	0.0441804	0.462833	0.581499	0.023335	0.0734437
NC_009831	Shewanella_sediminis_HAW_EB3_uid58835	Proteobacteria	0	0	5517674	0.0440204	0.460779	0.572731	0.0187127	0.0502924
NC_004347	Shewanella_oneidensis_MR_1_uid57949	Proteobacteria	0.66	1.377	4969803	0.0435138	0.459608	0.556637	0.0243104	0.0773649
NC_009052	Shewanella_baltica_OS155_uid58259	Proteobacteria	0	0	5127376	0.0434043	0.462834	0.573618	0.0220083	0.0769336
NC_007645	Hahella_chejuensis_KCTC_2396_uid58483	Proteobacteria	0	0	7215267	0.0430167	0.538697	0.570016	0.0317895	0.0608661
NC_008321	Shewanella_MR_4_uid58345	Proteobacteria	0	0	4706287	0.0428246	0.478945	0.571756	0.0202645	0.0724513
NC_011566	Shewanella_piezotolerans_WP3_uid58745	Proteobacteria	0	0	5396476	0.0423021	0.432918	0.567924	0.0192284	0.0620224
NC_013512	Sulfurospirillum_deleyianum_DSM_6946	Proteobacteria	0	0	2306351	0.0422776	0.389698	0.638693	0.0199299	0.0771374
NC_013422	Halothiobacillus_neapolitanus_c2	Proteobacteria	0	0	2582886	0.041998	0.547136	0.578344	0.0448732	0.108399
NC_006370	Photobacterium_profundum_SS9	Proteobacteria	2.5	0	4085304	0.0417898	0.419689	0.567916	0.0145972	0.0564625
NC_002946	Neisseria_gonorrhoeae_FA_1090_uid57611	Proteobacteria	1.1	0	2153922	0.041762	0.526897	0.547726	0.135026	0.183856
NC_012917	Pectobacterium_carotovorum_PC1_uid59295	Proteobacteria	0	0	4862913	0.0417085	0.519318	0.555137	0.0183061	0.0581218
NC_010334	Shewanella_halifaxensis_HAW_EB4_uid59007	Proteobacteria	0	0	5226917	0.0416014	0.445909	0.571896	0.0155275	0.0524309
NC_008322	Shewanella_MR_7_uid58343	Proteobacteria	0	0	4792610	0.0415657	0.478658	0.578277	0.0230058	0.0818475
NC_004547	Pectobacterium_atrosepticum_SCRI1043_uid57957	Proteobacteria	0.2	0	5064019	0.0415399	0.509673	0.570821	0.0200459	0.059191
NC_013016	Neisseria_meningitidis_alpha14	Proteobacteria	0	0	2145295	0.0415388	0.519472	0.551577	0.120053	0.159331
NC_011883	Desulfovibrio_desulfuricans_ATCC_27774_uid59213	Proteobacteria	0	0	2873437	0.0413947	0.580722	0.477688	0.042777	0.114537
NC_011186	Vibrio_fischeri_MJ11_uid58907	Proteobacteria	0	0	1418848	0.0413251	0.372495	0.591381	0.01291	0.0683863
NC_005363	Bdellovibrio_bacteriovorus	Proteobacteria	1.4	0	3782950	0.0412863	0.506455	0.557601	0.0246497	0.081779
NC_004061	Buchnera_aphidicola_Sg__Schizaphis_graminum__uid57913	Proteobacteria	36	-0.069	641454	0.041197	0.253306	0.568015	0.0152001	0.146324
NC_013209	Acetobacter_pasteurianus_IFO_3283_01_uid59279	Proteobacteria	0	0	2907495	0.0411849	0.530368	0.566045	0.0252053	0.0588248
NC_010336	Francisella_philomiragia_ATCC_25017_uid59105	Proteobacteria	0	0	2045775	0.0411585	0.325733	0.614982	0.00985228	0.0651803
NC_004757	Nitrosomonas_europaea_ATCC_19718_uid57647	Proteobacteria	18.5	-0.884	2812094	0.0410321	0.507182	0.56603	0.0301019	0.0581565
NC_013889	Thioalkalivibrio_K90mix_uid46181	Proteobacteria	0	0	2744800	0.0408955	0.658715	0.59409	0.0447882	0.0578022
NC_008767	Neisseria_meningitidis_FAM18_uid57825	Proteobacteria	0	0	2194961	0.0405306	0.516237	0.535204	0.13066	0.152911
NC_014216	Desulfurivibrio_alkaliphilus_AHT2_uid49487	Proteobacteria	0	0	3097763	0.0405141	0.602863	0.560519	0.0604971	0.0858626
NC_008577	Shewanella_ANA_3_uid58347	Proteobacteria	0	0	4972204	0.0404951	0.48055	0.574696	0.0212251	0.0723965
NC_010120	Neisseria_meningitidis_053442_uid58587	Proteobacteria	0	0	2153416	0.0403749	0.517003	0.534918	0.1327	0.179573
NC_005085	Chromobacterium_violaceum_ATCC_12472_uid58001	Proteobacteria	0.8	0	4751080	0.0403677	0.648337	0.566954	0.0622136	0.0830283
NC_006841	Vibrio_fischeri_ES114_uid58163	Proteobacteria	0.3	0	1332022	0.0400857	0.369758	0.589438	0.0128405	0.0727741
NC_011035	Neisseria_gonorrhoeae_NCCP11945_uid59191	Proteobacteria	0	0	2232025	0.0399767	0.523665	0.552048	0.138216	0.189956
NC_003116	Neisseria_meningitidis_Z2491_uid57819	Proteobacteria	1	-0.099	2184406	0.0397481	0.518091	0.546267	0.128014	0.152323
NC_009379	Polynucleobacter_necessarius_asymbioticus_QLW_P1DMWA_1_uid58611	Proteobacteria	0	0	2159490	0.0395918	0.448341	0.650289	0.0194548	0.0822251
NC_008740	Marinobacter_aquaeolei_VT8_uid59419	Proteobacteria	0	0	4326849	0.0394765	0.572721	0.580871	0.0324481	0.060811
NC_006369	Legionella_pneumophila_Lens_uid58209	Proteobacteria	0	0	3345687	0.0387873	0.38415	0.572471	0.0189782	0.0793017
NC_012559	Laribacter_hongkongensis_HLHK9_uid59265	Proteobacteria	0	0	3169329	0.0386886	0.623523	0.525356	0.086775	0.13358
NC_009663	Sulfurovum_NBC37_1_uid58863	Proteobacteria	0	0	2562277	0.0385107	0.438715	0.644381	0.025604	0.089532
NC_002942	Legionella_pneumophila_Philadelphia_1_uid57609	Proteobacteria	3.3	0	3397754	0.0381567	0.382695	0.568661	0.0184973	0.0782813
NC_010814	Geobacter_lovleyi_SZ_uid58713	Proteobacteria	0	0	3917761	0.0380516	0.547705	0.552318	0.035635	0.0660729
NC_003112	Neisseria_meningitidis_MC58_uid57817	Proteobacteria	0	0	2272360	0.0380301	0.515278	0.535887	0.13585	0.176257
NC_002977	Methylococcus_capsulatus_Bath_uid57607	Proteobacteria	0	0	3304561	0.0378428	0.635846	0.558903	0.0609045	0.0905992
NC_009802	Campylobacter_concisus_13826_uid58667	Proteobacteria	0	0	2052007	0.0377192	0.394289	0.636552	0.024963	0.116341
NC_012039	Campylobacter_lari_RM2100_uid58115	Proteobacteria	0	0	1525460	0.0375913	0.297035	0.644474	0.0105349	0.0764925
NC_006368	Legionella_pneumophila_Paris_uid58211	Proteobacteria	0	0	3503610	0.0375187	0.383719	0.578321	0.0199561	0.0813263
NC_014125	Legionella_pneumophila_2300_99_Alcoy_uid48801	Proteobacteria	0	0	3516334	0.0375112	0.383776	0.582628	0.020508	0.0854886
NC_002163	Campylobacter_jejuni_NCTC_11168_uid57587	Proteobacteria	1.5	0.486	1641481	0.0373644	0.305486	0.613383	0.0114786	0.090906
NC_004459	Vibrio_vulnificus_CMCP6	Proteobacteria	0.16	1.95	3281945	0.0370884	0.464499	0.61277	0.0196033	0.0703689
NC_008787	Campylobacter_jejuni_81_176_uid58503	Proteobacteria	0	0	1616554	0.0366347	0.306204	0.609933	0.0124799	0.0949146
NC_011744	Vibrio_splendidus_LGP32_uid59353	Proteobacteria	0	0	1675519	0.0364371	0.436423	0.537062	0.02035	0.0746526
NC_005139	Vibrio_vulnificus_YJ016_uid58007	Proteobacteria	0	0	3354505	0.0364134	0.464113	0.615715	0.022765	0.0881706
NC_009839	Campylobacter_jejuni_81116_uid58771	Proteobacteria	0	0	1628115	0.0363519	0.305415	0.594828	0.0106462	0.0856383
NC_011184	Vibrio_fischeri_MJ11_uid58907	Proteobacteria	0	0	2905029	0.036347	0.388734	0.60139	0.0136995	0.0665926
NC_008344	Nitrosomonas_eutropha_C91_uid58363	Proteobacteria	0	0	2661057	0.0361296	0.484863	0.538871	0.027748	0.0608095
NC_012913	Aggregatibacter_aphrophilus_NJ8700_uid59407	Proteobacteria	0	0	2313035	0.0361253	0.42231	0.546889	0.0316141	0.111452
NC_011753	Vibrio_splendidus_LGP32_uid59353	Proteobacteria	0	0	3299302	0.0360995	0.440437	0.594365	0.0202111	0.0765761
NC_006840	Vibrio_fischeri_ES114_uid58163	Proteobacteria	0.3	0	2906179	0.035995	0.388371	0.606424	0.0142021	0.0664677
NC_007963	Chromohalobacter_salexigens_DSM_3043	Proteobacteria	0	0	3696649	0.035804	0.639119	0.561116	0.0477233	0.0921049
NC_014010	Candidatus_Puniceispirillum_marinum_IMCC1322_uid47081	Proteobacteria	0	0	2753527	0.0357538	0.488537	0.610149	0.0156443	0.0646197
NC_007205	Candidatus_Pelagibacter_ubique_HTCC1062_uid58401	Proteobacteria	0	0	1308759	0.0355978	0.296831	0.646711	0.0148519	0.132217
NC_012108	Desulfobacterium_autotrophicum_HRM2_uid59061	Proteobacteria	0	0	5589073	0.0353234	0.48847	0.54964	0.0437317	0.126008
NC_002940	Haemophilus_ducreyi_35000HP_uid57625	Proteobacteria	1.8	0	1698955	0.0353176	0.382205	0.574592	0.0241086	0.101994
NC_002506	Vibrio_cholerae_O1_biovar_El_Tor_N16961_uid57623	Proteobacteria	0.2	1.725	1072315	0.0351772	0.469135	0.587912	0.0247098	0.111594
NC_009850	Arcobacter_butzleri_RM4018_uid58557	Proteobacteria	0	0	2341251	0.0349142	0.270452	0.612932	0.0113229	0.0819343
NC_004129	Pseudomonas_fluorescens_Pf_5_uid57937	Proteobacteria	0	0	7074893	0.0349067	0.633049	0.528846	0.159787	0.244032
NC_009708	Yersinia_pseudotuberculosis_IP_31758_uid58487	Proteobacteria	0	0	4723306	0.03489	0.475376	0.595099	0.0256354	0.0776726
NC_013166	Kangiella_koreensis_DSM_16069_uid59209	Proteobacteria	0	0	2852073	0.0347968	0.436871	0.644487	0.0209629	0.0641729
NC_010465	Yersinia_pseudotuberculosis_YPIII_uid59151	Proteobacteria	0	0	4689441	0.0346943	0.475304	0.593892	0.0269424	0.0718175
NC_008149	Yersinia_pestis_Nepal516_uid58609	Proteobacteria	0	0	4534590	0.0346871	0.47584	0.594166	0.0226551	0.0686977
NC_008601	Francisella_novicida_U112_uid58499	Proteobacteria	0	0	1910031	0.0346188	0.32475	0.624563	0.0115868	0.0741254
NC_008345	Shewanella_frigidimarina_NCIMB_400_uid58265	Proteobacteria	0	0	4845257	0.0345986	0.415841	0.583664	0.0189388	0.0690883
NC_006526	Zymomonas_mobilis_ZM4_uid58095	Proteobacteria	0	0	2056416	0.0343321	0.463269	0.542939	0.0198495	0.0784779
NC_010634	Yersinia_pseudotuberculosis_PB1__uid59153	Proteobacteria	0	0	4695619	0.0342973	0.475289	0.592191	0.0269761	0.0729755
NC_006371	Photobacterium_profundum_SS9	Proteobacteria	2.5	0	2237943	0.0342685	0.412227	0.543641	0.022064	0.0754998
NC_008700	Shewanella_amazonensis_SB2B_uid58257	Proteobacteria	0	0	4306142	0.0342423	0.535864	0.562569	0.0275709	0.0745194
NC_013173	Desulfomicrobium_baculatum_DSM_4028_uid59217	Proteobacteria	0	0	3942657	0.0341194	0.58647	0.510483	0.103642	0.159319
NC_011833	Buchnera_aphidicola_5A__Acyrthosiphon_pisum__uid59285	Proteobacteria	0	0	642122	0.034115	0.262857	0.56962	0.0163547	0.133744
NC_011834	Buchnera_aphidicola_Tuc7__Acyrthosiphon_pisum__uid59283	Proteobacteria	0	0	641895	0.0341099	0.262925	0.571688	0.0164796	0.133695
NC_002528	Buchnera_aphidicola_APS__Acyrthosiphon_pisum__uid57805	Proteobacteria	0	-0.017	640681	0.034056	0.263125	0.571174	0.0172256	0.136211
NC_009655	Actinobacillus_succinogenes_130Z_uid58247	Proteobacteria	0	0	2319663	0.0340131	0.449186	0.636364	0.0162845	0.0705167
NC_013446	Comamonas_testosteroni_CNB_1_uid29203	Proteobacteria	0	0	5373643	0.0339909	0.61439	0.565979	0.0592234	0.0994822
NC_006155	Yersinia_pseudotuberculosis_IP_32953_uid58157	Proteobacteria	0.5	0	4744671	0.0338685	0.476104	0.585278	0.0200128	0.0677034
NC_008095	Myxococcus_xanthus_DK_1622_uid58003	Proteobacteria	0	0	9139763	0.0337717	0.688912	0.531857	0.055987	0.0483125
NC_012580	Vibrio_cholerae_M66_2_uid59355	Proteobacteria	0	1.725	1046382	0.0337009	0.47036	0.580614	0.024382	0.106108
NC_009659	Janthinobacterium_Marseille_uid58603	Proteobacteria	0	0	4110251	0.0335106	0.542342	0.5915	0.0312442	0.0936718
NC_008340	Alkalilimnicola_ehrlichii_MLHE_1_uid58467	Proteobacteria	0	0	3275944	0.0334963	0.675313	0.585545	0.0519832	0.0563941
NC_009138	Herminiimonas_arsenicoxydans_uid58291	Proteobacteria	0	0	3424307	0.0332123	0.542949	0.57997	0.0290401	0.0851437
NC_013456	Vibrio_Ex25	Proteobacteria	0	0	3259580	0.0329147	0.448788	0.605146	0.0177443	0.0807828
NC_003912	Campylobacter_jejuni_RM1221_uid57899	Proteobacteria	0	0	1777831	0.0328597	0.303061	0.598802	0.0124332	0.105698
NC_006570	Francisella_tularensis_SCHU_S4_uid57589	Proteobacteria	0	0	1892819	0.0327929	0.322586	0.615039	0.0130803	0.0701691
NC_008245	Francisella_tularensis_FSC198_uid58693	Proteobacteria	0	0	1892616	0.0327864	0.3226	0.615286	0.013067	0.0706524
NC_013861	Legionella_longbeachae_NSW150_uid46099	Proteobacteria	0	0	4077332	0.0326868	0.371117	0.548795	0.0246376	0.104607
NC_007624	Brucella_melitensis_biovar_Abortus	Proteobacteria	0	0.896	1156948	0.0325321	0.573408	0.561471	0.0457728	0.105002
NC_003318	Brucella_melitensis_bv__1_16M_uid57735	Proteobacteria	2	0.896	1177787	0.0323361	0.573379	0.560633	0.0417144	0.101716
NC_013355	Zymomonas_mobilis_NCIMB_11163	Proteobacteria	0	0	2124771	0.0322552	0.468289	0.556976	0.0310092	0.0923593
NC_010104	Brucella_canis_ATCC_23365_uid59009	Proteobacteria	0	0	1206800	0.0322357	0.573037	0.559233	0.0463745	0.102191
NC_010740	Brucella_abortus_S19_uid58873	Proteobacteria	0	0	1161449	0.032221	0.573364	0.556202	0.0413371	0.10993
NC_004311	Brucella_suis_1330_uid57927	Proteobacteria	2	0	1207381	0.0322127	0.573164	0.554395	0.0473902	0.102526
NC_014207	Methylotenera_301_uid49469	Proteobacteria	0	0	3059871	0.0321226	0.426351	0.587405	0.0175245	0.0574078
NC_009749	Francisella_tularensis_holarctica_FTNF002_00_uid58999	Proteobacteria	0	0	1890909	0.0320803	0.321615	0.622208	0.0136618	0.0735818
NC_013118	Brucella_microti_CCM_4915_uid59319	Proteobacteria	0	0	1220319	0.0320195	0.573044	0.562982	0.0451136	0.100881
NC_009504	Brucella_ovis_ATCC_25840_uid58113	Proteobacteria	0	0	1164220	0.0320094	0.572255	0.543184	0.0454095	0.0992999
NC_010167	Brucella_suis_ATCC_23445_uid59015	Proteobacteria	0	0	1400844	0.0319807	0.573284	0.571212	0.0473477	0.10229
NC_009381	Yersinia_pestis_Pestoides_F_uid58619	Proteobacteria	0	0	4517345	0.0319619	0.476439	0.585499	0.0225761	0.0709161
NC_009707	Campylobacter_jejuni_doylei_269_97_uid58671	Proteobacteria	0	0	1845106	0.0319516	0.305733	0.579769	0.0129708	0.0964731
NC_010103	Brucella_canis_ATCC_23365_uid59009	Proteobacteria	0	0	2105969	0.0319487	0.572077	0.595907	0.0474504	0.10622
NC_004310	Brucella_suis_1330_uid57927	Proteobacteria	2	0	2107794	0.0318731	0.57214	0.595283	0.0490322	0.101481
NC_007880	Francisella_tularensis_holarctica_LVS_uid58595	Proteobacteria	0	0	1895994	0.031845	0.321526	0.60885	0.0138865	0.071967
NC_007618	Brucella_melitensis_biovar_Abortus	Proteobacteria	0	0.896	2121359	0.0318112	0.57157	0.6085	0.0491358	0.103873
NC_003317	Brucella_melitensis_bv__1_16M_uid57735	Proteobacteria	2	0.896	2117144	0.0318023	0.57158	0.606414	0.0452921	0.10103
NC_008369	Francisella_tularensis_holarctica_OSU18_uid58687	Proteobacteria	0	0	1895727	0.0317804	0.321581	0.623102	0.0160966	0.0762681
NC_009439	Pseudomonas_mendocina_ymp_uid58723	Proteobacteria	0	0	5072807	0.0317483	0.646761	0.539835	0.174298	0.277715
NC_012578	Vibrio_cholerae_M66_2_uid59355	Proteobacteria	0	1.725	2892523	0.0317463	0.478319	0.586636	0.0198208	0.0832569
NC_002505	Vibrio_cholerae_O1_biovar_El_Tor_N16961_uid57623	Proteobacteria	0.2	1.725	2961149	0.0316782	0.476948	0.588515	0.0208263	0.0887007
NC_006932	Brucella_abortus_bv__1_9_941_uid58019	Proteobacteria	2	0	2124241	0.031673	0.571558	0.60621	0.0480294	0.103789
NC_010742	Brucella_abortus_S19_uid58873	Proteobacteria	0	0	2122487	0.0316596	0.571589	0.604474	0.0443793	0.10789
NC_004603	Vibrio_parahaemolyticus_RIMD_2210633_uid57969	Proteobacteria	0.2	1.886	3288558	0.0316364	0.453856	0.601819	0.0225939	0.0997455
NC_009505	Brucella_ovis_ATCC_25840_uid58113	Proteobacteria	0	0	2111370	0.031625	0.571775	0.603323	0.0469965	0.103783
NC_009832	Serratia_proteamaculans_568_uid58725	Proteobacteria	0	0	5448853	0.0315936	0.550736	0.564711	0.0228153	0.0658337
NC_010169	Brucella_suis_ATCC_23445_uid59015	Proteobacteria	0	0	1923763	0.0315377	0.571156	0.597186	0.0482417	0.100212
NC_004917	Helicobacter_hepaticus_ATCC_51449_uid57737	Proteobacteria	4.2	0	1799146	0.0314983	0.359313	0.577067	0.03175	0.088606
NC_007954	Shewanella_denitrificans_OS217_uid58263	Proteobacteria	0	0	4545906	0.0314771	0.451492	0.616942	0.0221279	0.0714522
NC_007575	Sulfurimonas_denitrificans_DSM_1251_uid58185	Proteobacteria	0	0	2201561	0.0313964	0.34462	0.613842	0.0161088	0.0628786
NC_012560	Azotobacter_vinelandii_DJ_uid57597	Proteobacteria	0	0	5365318	0.0312228	0.656755	0.555754	0.224818	0.284687
NC_010677	Francisella_tularensis_mediasiatica_FSC147_uid58939	Proteobacteria	0	0	1893886	0.0311233	0.322542	0.639403	0.0129648	0.0733929
NC_012442	Brucella_melitensis_ATCC_23457_uid59241	Proteobacteria	0	0.896	1185518	0.031048	0.573452	0.55929	0.0478726	0.100295
NC_009257	Francisella_tularensis_WY96_3418_uid58811	Proteobacteria	0	0	1898476	0.0307931	0.322686	0.618596	0.0142184	0.0744831
NC_012691	Tolumonas_auensis_DSM_9187_uid59395	Proteobacteria	0	0	3471292	0.0307459	0.49027	0.557083	0.0164941	0.0562613
NC_009457	Vibrio_cholerae_O395_uid58425	Proteobacteria	0	1.725	3024069	0.0305353	0.477801	0.592633	0.0184312	0.0836514
NC_008570	Aeromonas_hydrophila_ATCC_7966_uid58617	Proteobacteria	0	0	4744448	0.0303812	0.615484	0.555367	0.0973766	0.159807
NC_008800	Yersinia_enterocolitica_8081_uid57741	Proteobacteria	0	0	4615899	0.0303778	0.472711	0.575964	0.0190183	0.0679076
NC_009456	Vibrio_cholerae_O395_uid58425	Proteobacteria	0	1.725	1108250	0.0302333	0.468845	0.593116	0.0277392	0.124524
NC_002928	Bordetella_parapertussis_12822_uid57615	Proteobacteria	0	0	4773551	0.0300118	0.681	0.561827	0.101557	0.145176
NC_009348	Aeromonas_salmonicida_A449_uid58631	Proteobacteria	0	0	4702402	0.0299277	0.585112	0.556754	0.0745335	0.138657
NC_011988	Agrobacterium_vitis_S4_uid58249	Proteobacteria	0	0	1283187	0.0298951	0.575185	0.557455	0.0374084	0.107857
NC_002927	Bordetella_bronchiseptica_RB50_uid57613	Proteobacteria	0	0	5339179	0.0298857	0.68077	0.556802	0.0941627	0.133431
NC_009792	Citrobacter_koseri_ATCC_BAA_895_uid58143	Proteobacteria	0	0	4720462	0.0295971	0.538278	0.550201	0.0310727	0.0793415
NC_002947	Pseudomonas_putida_KT2440_uid57843	Proteobacteria	1.1	0.917	6181863	0.0295395	0.615241	0.550093	0.0972525	0.122879
NC_009434	Pseudomonas_stutzeri_A1501_uid58641	Proteobacteria	0	0	4567418	0.029354	0.638785	0.536952	0.0900253	0.154995
NC_012668	Vibrio_cholerae_MJ_1236_uid59387	Proteobacteria	0	1.725	3149584	0.0293207	0.47517	0.605349	0.020177	0.0834393
NC_006512	Idiomarina_loihiensis_L2TR_uid58087	Proteobacteria	0	0	2839318	0.0293049	0.470402	0.619338	0.0146341	0.0586222
NC_011989	Agrobacterium_vitis_S4_uid58249	Proteobacteria	0	0	3726375	0.0292679	0.576576	0.557377	0.0406756	0.097377
NC_009512	Pseudomonas_putida_F1_uid58355	Proteobacteria	0	0.917	5959964	0.0292609	0.618619	0.545905	0.0896612	0.113573
NC_010322	Pseudomonas_putida_GB_1_uid58735	Proteobacteria	0	0.917	6078430	0.0292404	0.619422	0.547623	0.108051	0.135761
NC_004460	Vibrio_vulnificus_CMCP6	Proteobacteria	0.16	1.95	1844853	0.0291595	0.471192	0.537621	0.0218768	0.0814971
NC_002663	Pasteurella_multocida_Pm70_uid57627	Proteobacteria	1	1.339	2257487	0.0290912	0.404049	0.583209	0.0210447	0.0807382
NC_011386	Oligotropha_carboxidovorans_OM5_uid59155	Proteobacteria	0	0	3745629	0.0289343	0.623995	0.595699	0.0715678	0.145587
NC_011313	Aliivibrio_salmonicida_LFI1238_uid59251	Proteobacteria	0	0	1206461	0.0289151	0.382377	0.569106	0.0265514	0.0928152
NC_012969	Methylovorus_SIP3_4_uid59367	Proteobacteria	0	0	2995511	0.0288215	0.548604	0.585227	0.045008	0.113579
NC_012441	Brucella_melitensis_ATCC_23457_uid59241	Proteobacteria	0	0.896	2125701	0.028759	0.571521	0.58507	0.0532138	0.113322
NC_010501	Pseudomonas_putida_W619_uid58651	Proteobacteria	0	0.917	5774330	0.0287427	0.614356	0.55028	0.0973716	0.137693
NC_008599	Campylobacter_fetus_82_40_uid58545	Proteobacteria	0	0	1773615	0.028602	0.333075	0.630169	0.0119569	0.0836491
NC_011761	Acidithiobacillus_ferrooxidans_ATCC_23270_uid57649	Proteobacteria	0	0	2982397	0.028572	0.587725	0.581876	0.0690694	0.0787251
NC_008309	Haemophilus_somnus_129PT_uid57929	Proteobacteria	0	0	2007700	0.0285092	0.371974	0.610491	0.0203097	0.0866801
NC_008027	Pseudomonas_entomophila_L48_uid58639	Proteobacteria	0	0	5888780	0.0281783	0.641597	0.559322	0.206889	0.202633
NC_005773	Pseudomonas_syringae_phaseolicola_1448A_uid58099	Proteobacteria	0	0.701	5928787	0.0281722	0.58015	0.546148	0.0466136	0.103045
NC_008347	Maricaulis_maris_MCS10_uid58689	Proteobacteria	0	0	3368780	0.0279882	0.627276	0.592423	0.0697301	0.127543
NC_008044	Ruegeria_TM1040_uid58193	Proteobacteria	0	0	3200938	0.0279799	0.604129	0.55827	0.0334327	0.0747267
NC_000963	Rickettsia_prowazekii	Proteobacteria	10	-0.421	1111523	0.0279463	0.290003	0.61899	0.0138476	0.0798982
NC_008463	Pseudomonas_aeruginosa_UCBPP_PA14_uid57977	Proteobacteria	0	-0.019	6537648	0.0279133	0.662922	0.541242	13.8516	19.8369
NC_010581	Beijerinckia_indica_ATCC_9039_uid59057	Proteobacteria	0	0	4170153	0.0278913	0.570599	0.520236	0.0821316	0.176182
NC_005140	Vibrio_vulnificus_YJ016_uid58007	Proteobacteria	0	0	1857073	0.0277496	0.472141	0.534788	0.025036	0.0896933
NC_008702	Azoarcus_BH72	Proteobacteria	0	0	4376040	0.0276419	0.679164	0.538365	0.208287	0.246406
NC_004605	Vibrio_parahaemolyticus_RIMD_2210633_uid57969	Proteobacteria	0.2	1.886	1877212	0.0276239	0.453515	0.553082	0.0230964	0.0895886
NC_003103	Rickettsia_conorii_Malish_7_uid57633	Proteobacteria	4.1	-0.41	1268755	0.0275554	0.324388	0.612974	0.0223354	0.113084
NC_014147	Moraxella_catarrhalis_RH4_uid48809	Proteobacteria	0	0	1863286	0.0275492	0.416716	0.584615	0.0407812	0.111825
NC_011206	Acidithiobacillus_ferrooxidans_ATCC_53993_uid58613	Proteobacteria	0	0	2885038	0.027547	0.588505	0.567434	0.0742601	0.0834202
NC_007650	Burkholderia_thailandensis_E264_uid58081	Proteobacteria	0	0	2914771	0.0274804	0.68075	0.568336	0.0363715	0.0552358
NC_008709	Psychromonas_ingrahamii_37_uid58521	Proteobacteria	0	0	4559598	0.027466	0.400863	0.611283	0.0174678	0.0779081
NC_009656	Pseudomonas_aeruginosa_PA7_uid58627	Proteobacteria	0	-0.019	6588339	0.0274061	0.664494	0.535879	0.592393	0.772254
NC_010067	Salmonella_enterica_arizonae_serovar_62_z4_z23__RSK2980_uid58191	Proteobacteria	0	0	4600800	0.0273752	0.513767	0.572604	0.0240959	0.0746051
NC_002516	Pseudomonas_aeruginosa_PAO1_uid57945	Proteobacteria	0.5	-0.019	6264403	0.0273459	0.665557	0.559526	-3.14376	-4.61997
NC_011274	Salmonella_enterica_serovar_Gallinarum_287_91_uid59249	Proteobacteria	0	0	4658697	0.0273388	0.522046	0.580621	0.0197052	0.0632632
NC_006300	Mannheimia_succiniciproducens_MBEL55E_uid58197	Proteobacteria	0	0	2314078	0.0273267	0.42538	0.562263	0.0233254	0.094749
NC_007435	Burkholderia_pseudomallei_1710b_uid58391	Proteobacteria	0	0	3181762	0.0272503	0.684608	0.564152	0.0444271	0.0609886
NC_009078	Burkholderia_pseudomallei_1106a_uid58515	Proteobacteria	0	0	3100794	0.0272279	0.686419	0.552882	0.0648076	0.0653665
NC_009446	Dichelobacter_nodosus_VCS1703A_uid57643	Proteobacteria	0	0	1389350	0.0272134	0.443957	0.573886	0.0285483	0.0748479
NC_009882	Rickettsia_rickettsii__Sheila_Smith__uid58027	Proteobacteria	0	0	1257710	0.0271159	0.324674	0.594635	0.0245168	0.118455
NC_006349	Burkholderia_mallei_ATCC_23344_uid57725	Proteobacteria	0.4	0	2325379	0.0270902	0.689856	0.553475	0.0523053	0.0604474
NC_007005	Pseudomonas_syringae_B728a_uid57931	Proteobacteria	0	0.701	6093698	0.0270269	0.592328	0.523884	0.053103	0.1185
NC_011294	Salmonella_enterica_serovar_Enteritidis_P125109_uid59247	Proteobacteria	0	0	4685848	0.0270133	0.521673	0.585395	0.0207027	0.0642574
NC_009075	Burkholderia_pseudomallei_668_uid58389	Proteobacteria	0	0	3127456	0.0269727	0.686253	0.561398	0.0607961	0.0639039
NC_010263	Rickettsia_rickettsii_Iowa_uid58961	Proteobacteria	0	0	1268175	0.0269387	0.324468	0.589725	0.0276441	0.12946
NC_011770	Pseudomonas_aeruginosa_LESB58_uid59275	Proteobacteria	0	-0.019	6601757	0.0269087	0.662974	0.559494	4.23156	6.10938
NC_011080	Salmonella_enterica_serovar_Newport_SL254_uid58831	Proteobacteria	0	0	4827641	0.0267955	0.522167	0.586947	0.0244877	0.0734384
NC_009879	Rickettsia_canadensis_McKiel_uid58159	Proteobacteria	0	0	1159772	0.0267829	0.310539	0.61708	0.0210686	0.111311
NC_014166	Arcobacter_nitrofigilis_DSM_7299_uid49001	Proteobacteria	0	0	3192235	0.0267728	0.283609	0.595711	0.0123124	0.0886562
NC_011205	Salmonella_enterica_serovar_Dublin_CT_02021853_uid58917	Proteobacteria	0	0	4842908	0.026762	0.521796	0.583204	0.0246799	0.0735229
NC_008209	Roseobacter_denitrificans_OCh_114_uid58597	Proteobacteria	0	0	4133097	0.0267197	0.589687	0.540684	0.0271995	0.062647
NC_007643	Rhodospirillum_rubrum_ATCC_11170_uid57655	Proteobacteria	0	0	4352825	0.0266505	0.65448	0.537731	0.323417	0.532599
NC_011149	Salmonella_enterica_serovar_Agona_SL483_uid59431	Proteobacteria	0	0	4798660	0.0265962	0.520842	0.57694	0.0250415	0.0776488
NC_003197	Salmonella_enterica_serovar_Typhimurium_LT2_uid57799	Proteobacteria	0.4	0	4857432	0.0265329	0.522215	0.586386	0.0205074	0.0629381
NC_009715	Campylobacter_curvus_525_92_uid58669	Proteobacteria	0	0	1971264	0.0265119	0.445353	0.618653	0.0263067	0.116402
NC_010102	Salmonella_enterica_serovar_Paratyphi_B_SPB7_uid59097	Proteobacteria	0	0	4858887	0.0265108	0.521098	0.572885	0.0347131	0.0967956
NC_006511	Salmonella_enterica_serovar_Paratyphi_A_ATCC_9150_uid58201	Proteobacteria	0	0	4585229	0.0264879	0.521644	0.587531	0.0213446	0.0656204
NC_004088	Yersinia_pestis_KIM_10_uid57875	Proteobacteria	0	0	4600755	0.0264498	0.476412	0.567581	0.0276807	0.080511
NC_011147	Salmonella_enterica_serovar_Paratyphi_A_AKU_12601_uid59269	Proteobacteria	0	0	4581797	0.0264309	0.521837	0.587138	0.0210101	0.0653158
NC_012125	Salmonella_enterica_serovar_Paratyphi_C_RKS4594_uid59063	Proteobacteria	0	0	4833080	0.0264233	0.521632	0.58929	0.0259934	0.0752123
NC_009079	Burkholderia_mallei_NCTC_10247_uid58385	Proteobacteria	0	0	2352693	0.026377	0.689603	0.563084	0.0639778	0.0657523
NC_006351	Burkholderia_pseudomallei_K96243_uid57733	Proteobacteria	0.7	0	3173005	0.0263728	0.684938	0.58634	0.0395156	0.0635978
NC_011094	Salmonella_enterica_serovar_Schwarzengrund_CVM19633_uid58915	Proteobacteria	0	0	4709075	0.0263727	0.521741	0.587739	0.0242116	0.0784289
NC_007511	Burkholderia_383_uid58073	Proteobacteria	0	0	3587082	0.0263668	0.667298	0.553419	0.0405041	0.0612311
NC_008835	Burkholderia_mallei_NCTC_10229_uid58383	Proteobacteria	0	0	2284095	0.0263207	0.689402	0.558824	0.062416	0.0668103
NC_008784	Burkholderia_mallei_SAVP1_uid58387	Proteobacteria	0	0	1734922	0.026317	0.689158	0.552799	0.0677597	0.0660933
NC_006905	Salmonella_enterica_serovar_Choleraesuis_SC_B67_uid58017	Proteobacteria	0	0	4755700	0.0262073	0.521567	0.586887	0.0250691	0.0716436
NC_011083	Salmonella_enterica_serovar_Heidelberg_SL476_uid58973	Proteobacteria	0	0	4888768	0.0260646	0.520866	0.58	0.0259887	0.076228
NC_010519	Haemophilus_somnus_2336_uid57979	Proteobacteria	0	0	2263857	0.0260401	0.373781	0.596465	0.0240504	0.0887895
NC_007651	Burkholderia_thailandensis_E264_uid58081	Proteobacteria	0	0	3809201	0.025938	0.672862	0.59291	0.0411914	0.0748886
NC_012973	Helicobacter_pylori_B38_uid59415	Proteobacteria	0	0	1576758	0.0259266	0.391592	0.583635	0.0354192	0.115505
NC_009900	Rickettsia_massiliae_MTU5_uid58801	Proteobacteria	0	0	1360898	0.0258212	0.325434	0.607032	0.0152642	0.0876209
NC_003198	Salmonella_enterica_serovar_Typhi_CT18_uid57793	Proteobacteria	0	1.522	4809037	0.0257817	0.520927	0.582688	0.0227095	0.0664751
NC_004631	Salmonella_enterica_serovar_Typhi_Ty2_uid57973	Proteobacteria	0	0	4791961	0.0257343	0.520516	0.579643	0.0228487	0.0669012
NC_007434	Burkholderia_pseudomallei_1710b_uid58391	Proteobacteria	0	0	4126292	0.0255401	0.67606	0.566533	0.0430349	0.0744229
NC_007481	Pseudoalteromonas_haloplanktis_TAC125_uid58431	Proteobacteria	0	0	3214944	0.025537	0.402348	0.609806	0.0196634	0.0865939
NC_006350	Burkholderia_pseudomallei_K96243_uid57733	Proteobacteria	0.7	0	4074542	0.0255101	0.677199	0.578916	0.0392818	0.0761931
NC_013959	Sideroxydans_lithotrophicus_ES_1_uid46801	Proteobacteria	0	0	3003656	0.0252885	0.575417	0.634654	0.0490877	0.0869194
NC_007510	Burkholderia_383_uid58073	Proteobacteria	0	0	3694126	0.0251096	0.662051	0.583258	0.0471283	0.0901647
NC_009074	Burkholderia_pseudomallei_668_uid58389	Proteobacteria	0	0	3912947	0.0250857	0.680205	0.572663	0.0568242	0.084421
NC_009667	Ochrobactrum_anthropi_ATCC_49188_uid58921	Proteobacteria	0	0	2887297	0.0250438	0.560509	0.573005	0.0378241	0.10573
NC_010611	Acinetobacter_baumannii_ACICU_uid58765	Proteobacteria	0	0	3904116	0.025031	0.390313	0.610747	0.0192562	0.0859995
NC_010117	Coxiella_burnetii_RSA_331_uid58637	Proteobacteria	0	0.175	2016427	0.0249416	0.427642	0.578538	0.0477532	0.143579
NC_010278	Actinobacillus_pleuropneumoniae_serovar_3_JL03_uid58891	Proteobacteria	0	0	2242062	0.0249244	0.412328	0.587917	0.0173895	0.0849052
NC_007509	Burkholderia_383_uid58073	Proteobacteria	0	0	1395069	0.0248554	0.652748	0.589744	0.035694	0.0619915
NC_009053	Actinobacillus_pleuropneumoniae_serovar_5b_L20_uid58789	Proteobacteria	0	0	2274482	0.0248549	0.412995	0.584493	0.0155502	0.0794022
NC_007492	Pseudomonas_fluorescens_Pf0_1_uid57591	Proteobacteria	0	0	6438405	0.0248349	0.60521	0.530409	0.112282	0.157639
NC_003062	Agrobacterium_tumefaciens_C58_uid57865	Proteobacteria	3	1.048	2841581	0.0248263	0.593752	0.561867	0.105918	0.227276
NC_009727	Coxiella_burnetii_Dugway_5J108_111_uid58629	Proteobacteria	0	0.175	2158758	0.0247874	0.424358	0.584546	0.0410863	0.137301
NC_014259	Acinetobacter_DR1_uid50119	Proteobacteria	0	0	4152543	0.0246545	0.387321	0.597832	0.017738	0.0808907
NC_009524	Psychrobacter_PRwf_1_uid58459	Proteobacteria	0	0	2978976	0.0246246	0.448749	0.563951	0.0233128	0.113324
NC_010515	Burkholderia_cenocepacia_MC0_3_uid58769	Proteobacteria	0	0	3213911	0.0246239	0.666012	0.569792	0.0420067	0.0678146
NC_007953	Burkholderia_xenovorans_LB400_uid57823	Proteobacteria	0	0	1471779	0.0245859	0.617271	0.609458	0.0345353	0.0627034
NC_011985	Agrobacterium_radiobacter_K84_uid58269	Proteobacteria	0	0	4005130	0.0245615	0.603374	0.551015	0.25009	0.470532
NC_009076	Burkholderia_pseudomallei_1106a_uid58515	Proteobacteria	0	0	3988455	0.0244954	0.679595	0.572782	0.0588093	0.0866504
NC_014029	Yersinia_pestis_Z176003_uid47317	Proteobacteria	0	0	4553586	0.0244585	0.476789	0.581993	0.0221963	0.0689638
NC_014109	Candidatus_Riesia_pediculicola_USDA_uid46841	Proteobacteria	0	0	574390	0.0244433	0.284826	0.561922	0.0244492	0.134333
NC_005966	Acinetobacter_sp_ADP1	Proteobacteria	0.5	0	3598621	0.0244357	0.404296	0.607381	0.0200065	0.0758071
NC_013440	Haliangium_ochraceum_DSM_14365	Proteobacteria	0	0	9446314	0.0243947	0.694834	0.527695	-2.43854	-2.09606
NC_009668	Ochrobactrum_anthropi_ATCC_49188_uid58921	Proteobacteria	0	0	1895911	0.0243403	0.562229	0.55595	0.0503819	0.129273
NC_014256	Helicobacter_pylori_B8_uid49873	Proteobacteria	0	0	1673997	0.024334	0.387949	0.585538	0.0442792	0.143384
NC_011586	Acinetobacter_baumannii_AB0057_uid59083	Proteobacteria	0	0	4050513	0.0242673	0.392053	0.610554	0.0183682	0.0838774
NC_007109	Rickettsia_felis_URRWXCal2_uid58331	Proteobacteria	0	0	1485148	0.0242265	0.324504	0.595136	0.0194654	0.0995984
NC_012985	Candidatus_Liberibacter_asiaticus_psy62_uid59227	Proteobacteria	0	0	1227204	0.0242242	0.364639	0.518051	0.061133	0.138623
NC_004578	Pseudomonas_syringae_tomato_DC3000_uid57967	Proteobacteria	1.47	0.701	6397126	0.024224	0.583989	0.532749	0.0582862	0.120693
NC_012660	Pseudomonas_fluorescens_SBW25	Proteobacteria	0	0	6722539	0.0241366	0.605046	0.538007	0.126349	0.165392
NC_003143	Yersinia_pestis_CO92_uid57621	Proteobacteria	1.25	1.153	4653728	0.0239919	0.476361	0.566941	0.0254801	0.0751417
NC_011528	Coxiella_burnetii_CbuK_Q154_uid58895	Proteobacteria	0	0.175	2063100	0.0239562	0.426734	0.584518	0.0490737	0.155752
NC_008150	Yersinia_pestis_Antiqua_uid58607	Proteobacteria	0	0	4702289	0.0239545	0.477012	0.566074	0.02789	0.0776933
NC_011595	Acinetobacter_baumannii_AB307_0294_uid59271	Proteobacteria	0	0	3760981	0.0238605	0.390437	0.594203	0.017799	0.0840173
NC_011901	Thioalkalivibrio_HL_EbGR7_uid59179	Proteobacteria	0	0	3464554	0.0237843	0.65063	0.575564	0.159042	0.167494
NC_011527	Coxiella_burnetii_CbuG_Q212_uid58893	Proteobacteria	0	0.175	2008870	0.0237059	0.426331	0.581769	0.0495001	0.14891
NC_008061	Burkholderia_cenocepacia_AU_1054_uid58371	Proteobacteria	0	0	2788459	0.0235732	0.668614	0.565534	0.0443065	0.0726819
NC_010939	Actinobacillus_pleuropneumoniae_serovar_7_AP76_uid59231	Proteobacteria	0	0	2331981	0.023366	0.412124	0.583294	0.0171873	0.0831351
NC_008543	Burkholderia_cenocepacia_HI2424_uid58369	Proteobacteria	0	0	2998664	0.0233511	0.668789	0.562919	0.0454527	0.0715144
NC_008228	Pseudoalteromonas_atlantica_T6c_uid58283	Proteobacteria	0	0	5187005	0.0233254	0.446161	0.578738	0.0192955	0.0771262
NC_010410	Acinetobacter_baumannii_AYE	Proteobacteria	0	0	3936291	0.0231759	0.3938	0.596618	0.0180134	0.0809501
NC_011001	Burkholderia_cenocepacia_J2315_uid57953	Proteobacteria	0	0	3217062	0.0231397	0.67276	0.552228	0.0421245	0.0694262
NC_008060	Burkholderia_cenocepacia_AU_1054_uid58371	Proteobacteria	0	0	3294563	0.0230911	0.669357	0.572874	0.0522614	0.0989084
NC_009784	Vibrio_harveyi_ATCC_BAA_1116_uid58957	Proteobacteria	0	0	2204018	0.0230906	0.452712	0.558786	0.0428017	0.125874
NC_013850	Klebsiella_variicola_At_22_uid42113	Proteobacteria	0	0	5458505	0.0230032	0.575781	0.551226	0.0294684	0.0847226
NC_009566	Haemophilus_influenzae_PittEE_uid58591	Proteobacteria	0	1.492	1813033	0.0229797	0.380402	0.554591	0.0258904	0.102699
NC_008542	Burkholderia_cenocepacia_HI2424_uid58369	Proteobacteria	0	0	3483902	0.022922	0.667814	0.578847	0.0514842	0.0965367
NC_002971	Coxiella_burnetii_RSA_493_uid57631	Proteobacteria	8	0.175	1995281	0.0229156	0.426605	0.596588	0.0494306	0.1531
NC_010698	Helicobacter_pylori_Shi470_uid59165	Proteobacteria	0	0	1608547	0.0228815	0.389147	0.600511	0.0432856	0.148503
NC_009783	Vibrio_harveyi_ATCC_BAA_1116_uid58957	Proteobacteria	0	0	3765351	0.0228215	0.455465	0.587306	0.0274495	0.0942885
NC_010508	Burkholderia_cenocepacia_MC0_3_uid58769	Proteobacteria	0	0	3532883	0.0227619	0.667195	0.574232	0.0485275	0.0954943
NC_000907	Haemophilus_influenzae_Rd_KW20_uid57771	Proteobacteria	0.5	1.492	1830138	0.0227497	0.381479	0.550637	0.0217525	0.0882754
NC_007712	Sodalis_glossinidius__morsitans__uid58553	Proteobacteria	0	0	4171146	0.02273	0.54699	0.609053	0.029327	0.077082
NC_009085	Acinetobacter_baumannii_ATCC_17978_uid58731	Proteobacteria	0	0	3976747	0.0227055	0.389408	0.591343	0.016455	0.0752645
NC_009567	Haemophilus_influenzae_PittGG_uid58593	Proteobacteria	0	1.492	1887192	0.0225971	0.380092	0.573494	0.0293311	0.0937461
NC_007406	Nitrobacter_winogradskyi_Nb_255_uid58295	Proteobacteria	0	0	3402093	0.0225435	0.62049	0.567767	0.0672589	0.107121
NC_009881	Rickettsia_akari_Hartford_uid58161	Proteobacteria	0	0	1231060	0.0225383	0.323347	0.617834	0.0269609	0.114697
NC_007973	Cupriavidus_metallidurans_CH34_uid57815	Proteobacteria	0	0	3928089	0.022458	0.638203	0.567027	0.0524438	0.0921043
NC_011333	Helicobacter_pylori_G27_uid59305	Proteobacteria	0	0	1652982	0.0223656	0.388942	0.576794	0.0389079	0.118824
NC_000921	Helicobacter_pylori_J99_uid57789	Proteobacteria	0	0.016	1643831	0.0223606	0.391887	0.575696	0.0365694	0.11134
NC_006142	Rickettsia_typhi_Wilmington_uid58063	Proteobacteria	10	0	1111496	0.0223393	0.289194	0.573141	0.0149786	0.0843474
NC_007802	Jannaschia_CCS1_uid58147	Proteobacteria	0	0	4317977	0.0223162	0.623322	0.545584	0.0590214	0.0633398
NC_011312	Aliivibrio_salmonicida_LFI1238_uid59251	Proteobacteria	0	0	3325165	0.0223048	0.392284	0.566312	0.0305707	0.0854164
NC_012731	Klebsiella_pneumoniae_NTUH_K2044_uid59073	Proteobacteria	0	0	5248520	0.0222992	0.576767	0.545873	0.0313639	0.0869095
NC_000915	Helicobacter_pylori_26695_uid57787	Proteobacteria	2.4	0	1667867	0.0222889	0.388732	0.585459	0.0425014	0.128848
NC_013892	Xenorhabdus_bovienii_SS_2004_uid46345	Proteobacteria	0	0	4225498	0.0221967	0.449676	0.562207	0.0403298	0.0969459
NC_006833	Wolbachia_endosymbiont_TRS_of_Brugia_malayi_uid58107	Proteobacteria	14	0	1080084	0.0221946	0.341791	0.593789	0.0192339	0.0776516
NC_009648	Klebsiella_pneumoniae_MGH_78578_uid57619	Proteobacteria	0	0	5315120	0.0220827	0.574786	0.556021	0.0302197	0.0805079
NC_011992	Acidovorax_ebreus_TPSY_uid59233	Proteobacteria	0	0	3796573	0.0220739	0.66834	0.556067	0.117152	0.19759
NC_008358	Hyphomonas_neptunium_ATCC_15444_uid58433	Proteobacteria	0	0	3705021	0.0220703	0.619303	0.552669	0.231104	0.166492
NC_011000	Burkholderia_cenocepacia_J2315_uid57953	Proteobacteria	0	0	3870082	0.0220393	0.666814	0.570891	0.0454152	0.0912249
NC_007146	Haemophilus_influenzae_86_028NP_uid58093	Proteobacteria	0	1.492	1913428	0.0220108	0.381779	0.545302	0.025262	0.0912923
NC_011283	Klebsiella_pneumoniae_342_uid59145	Proteobacteria	0	0	5641239	0.0219978	0.572861	0.54222	0.0360561	0.0949066
NC_011498	Helicobacter_pylori_P12_uid59327	Proteobacteria	0	0	1673813	0.0219457	0.38809	0.578275	0.0338848	0.109902
NC_008229	Helicobacter_acinonychis_Sheeba_uid58685	Proteobacteria	0	0	1553927	0.0219309	0.381775	0.56797	0.0358111	0.116042
NC_010400	Acinetobacter_baumannii_SDF	Proteobacteria	0	0	3421954	0.0218752	0.391916	0.598214	0.0192487	0.0796922
NC_009494	Legionella_pneumophila_Corby_uid58733	Proteobacteria	0	0	3576470	0.02176	0.384785	0.552295	0.0311768	0.110064
NC_008086	Helicobacter_pylori_HPAG1_uid58517	Proteobacteria	0	0	1596366	0.0217106	0.390825	0.572828	0.037755	0.121351
NC_011365	Gluconacetobacter_diazotrophicus_PAl_5_uid59075	Proteobacteria	0	0	3887492	0.0216592	0.663781	0.575	0.0933359	0.102678
NC_013194	Candidatus_Accumulibacter_phosphatis_clade_IIA_UW_1_uid59207	Proteobacteria	0	0	5058518	0.0215731	0.64111	0.560462	0.141229	0.212409
NC_003910	Colwellia_psychrerythraea_34H_uid57855	Proteobacteria	0	0	5373180	0.0215645	0.380054	0.579751	0.024289	0.1017
NC_013941	Escherichia_coli_O55_H7_CB9615_uid46655	Proteobacteria	0	0	5386352	0.0215522	0.505231	0.576386	0.0262627	0.0716369
NC_013353	Escherichia_coli_O103_H2_12009	Proteobacteria	0	0	5449314	0.021508	0.506552	0.580249	0.0276678	0.0681799
NC_011353	Escherichia_coli_O157_H7_EC4115_uid59091	Proteobacteria	0	0	5572075	0.021413	0.505225	0.589464	0.0312289	0.0739426
NC_008062	Burkholderia_cenocepacia_AU_1054_uid58371	Proteobacteria	0	0	1196094	0.0212676	0.670447	0.587103	0.0418835	0.0808747
NC_002695	Escherichia_coli_O157_H7_Sakai_uid57781	Proteobacteria	0	0	5498450	0.0212653	0.505371	0.586075	0.0294651	0.0696503
NC_013008	Escherichia_coli_O157_H7_TW14359_uid59235	Proteobacteria	0	0	5528136	0.021201	0.505068	0.584586	0.0301084	0.0720579
NC_002655	Escherichia_coli_O157_H7_EDL933_uid57831	Proteobacteria	0	0	5528445	0.0210656	0.50383	0.581109	0.0286412	0.0680595
NC_010551	Burkholderia_ambifaria_MC40_6_uid58701	Proteobacteria	0	0	3443583	0.0210621	0.668984	0.591737	0.0502451	0.097804
NC_003911	Ruegeria_pomeroyi_DSS_3_uid57863	Proteobacteria	0	0	4109442	0.0209006	0.642229	0.542279	0.0396035	0.0664671
NC_013361	Escherichia_coli_O26_H11_11368	Proteobacteria	0	0	5697240	0.020882	0.506848	0.591274	0.0315181	0.0731819
NC_011601	Escherichia_coli_O127_H6_E2348_69_uid59343	Proteobacteria	0	0	4965553	0.0208567	0.505662	0.564711	0.0250771	0.0739094
NC_008563	Escherichia_coli_APEC_O1_uid58623	Proteobacteria	0	0	5082025	0.0208061	0.505473	0.571364	0.0216741	0.0632993
NC_002939	Geobacter_sulfurreducens_PCA_uid57743	Proteobacteria	6	0	3814139	0.020665	0.609373	0.661121	0.167301	0.201142
NC_010694	Erwinia_tasmaniensis_Et1_99_uid59029	Proteobacteria	0	0	3883467	0.020586	0.537318	0.589197	0.024622	0.0722839
NC_008544	Burkholderia_cenocepacia_HI2424_uid58369	Proteobacteria	0	0	1055417	0.0205786	0.67329	0.571895	0.0442242	0.0812931
NC_009943	Desulfococcus_oleovorans_Hxd3_uid58777	Proteobacteria	0	0	3944167	0.0205425	0.561686	0.568321	0.0514541	0.107199
NC_010688	Xanthomonas_campestris_B100	Proteobacteria	0	0.607	5079002	0.0205194	0.650416	0.56026	0.0772318	0.11138
NC_010552	Burkholderia_ambifaria_MC40_6_uid58701	Proteobacteria	0	0	2769414	0.0205134	0.665423	0.540109	0.0457685	0.0721658
NC_007508	Xanthomonas_campestris_vesicatoria_85_10_uid58321	Proteobacteria	0	0.607	5178466	0.0204736	0.647483	0.552385	0.0679476	0.106436
NC_003919	Xanthomonas_axonopodis_citri_306_uid57889	Proteobacteria	7	0.636	5175554	0.0203314	0.647719	0.555092	0.0649069	0.100913
NC_003063	Agrobacterium_tumefaciens_C58_uid57865	Proteobacteria	3	1.048	2074782	0.0202821	0.592984	0.540043	0.133306	0.305672
NC_003902	Xanthomonas_campestris_ATCC_33913_uid57887	Proteobacteria	3	0.607	5076188	0.0201777	0.650684	0.557071	0.0727583	0.104774
NC_004431	Escherichia_coli_CFT073_uid57915	Proteobacteria	0	0	5231428	0.0201345	0.504748	0.546289	0.0323936	0.0866006
NC_010557	Burkholderia_ambifaria_MC40_6_uid58701	Proteobacteria	0	0	1127947	0.0200763	0.658663	0.594623	0.0408164	0.0755838
NC_007946	Escherichia_coli_UTI89_uid58541	Proteobacteria	0	0	5065741	0.0200261	0.506042	0.550199	0.0295714	0.0787757
NC_007759	Syntrophus_aciditrophicus_SB_uid58539	Proteobacteria	0	0	3179300	0.0199339	0.5146	0.571338	0.0426162	0.0818816
NC_013364	Escherichia_coli_O111_H__11128	Proteobacteria	0	0	5371077	0.0198632	0.506171	0.578556	0.0293207	0.068882
NC_007974	Cupriavidus_metallidurans_CH34_uid57815	Proteobacteria	0	0	2580084	0.0197001	0.635994	0.510067	0.080276	0.0922127
NC_009485	Bradyrhizobium_BTAi1_uid58505	Proteobacteria	0	0	8264687	0.0196926	0.649201	0.567235	0.130369	0.253413
NC_007086	Xanthomonas_campestris_8004_uid57595	Proteobacteria	0	0.607	5148708	0.0196142	0.64957	0.558651	0.0737594	0.104268
NC_008392	Burkholderia_ambifaria_AMMD_uid58303	Proteobacteria	0	0	1281472	0.0196103	0.664807	0.564229	0.0391848	0.0762523
NC_003295	Ralstonia_solanacearum_GMI1000_uid57593	Proteobacteria	4	0.024	3716413	0.0195944	0.67037	0.600116	0.146637	0.199172
NC_011002	Burkholderia_cenocepacia_J2315_uid57953	Proteobacteria	0	0	875977	0.0195701	0.66916	0.584554	0.0442421	0.0898522
NC_008391	Burkholderia_ambifaria_AMMD_uid58303	Proteobacteria	0	0	2646969	0.0195223	0.668081	0.551812	0.0464508	0.0716537
NC_008782	Acidovorax_JS42_uid58427	Proteobacteria	0	0	4448856	0.0195016	0.661725	0.536945	0.126497	0.211414
NC_007948	Polaromonas_JS666_uid58207	Proteobacteria	0	0	5200264	0.0194798	0.624723	0.554817	0.0882207	0.190987
NC_013416	Aggregatibacter_actinomycetemcomitans_D11S_1	Proteobacteria	0	0	2105764	0.0194609	0.445531	0.532802	0.0484118	0.143149
NC_011071	Stenotrophomonas_maltophilia_R551_3_uid58657	Proteobacteria	0	0	4573969	0.0194367	0.662999	0.546941	0.0818089	0.114858
NC_009952	Dinoroseobacter_shibae_DFL_12_uid58707	Proteobacteria	0	0	3789584	0.0193652	0.660155	0.560424	0.0969344	0.0830077
NC_007908	Rhodoferax_ferrireducens_T118_uid58353	Proteobacteria	0	0	4712337	0.0192085	0.598793	0.544255	0.0578284	0.117293
NC_007951	Burkholderia_xenovorans_LB400_uid57823	Proteobacteria	0	0	4895836	0.0191436	0.627559	0.577331	0.0474341	0.0946152
NC_007626	Magnetospirillum_magneticum_AMB_1_uid58527	Proteobacteria	0	0	4967148	0.0190989	0.650935	0.540487	0.435412	0.512428
NC_014153	Thiomonas_intermedia_K12_uid48825	Proteobacteria	0	0	3396378	0.0190927	0.638794	0.539626	0.813586	1.1226
NC_005296	Rhodopseudomonas_palustris_CGA009	Proteobacteria	9	0	5459213	0.0190399	0.650381	0.568905	0.0847203	0.194806
NC_008253	Escherichia_coli_536_uid58531	Proteobacteria	0	0	4938920	0.0189616	0.505175	0.546557	0.0285038	0.0762769
NC_011415	Escherichia_coli_SE11_uid59425	Proteobacteria	0	0	4887515	0.0188646	0.507965	0.574054	0.0246996	0.0730268
NC_012724	Burkholderia_glumae_BGR1_uid59397	Proteobacteria	0	0	3906529	0.0187944	0.681107	0.57408	0.0902102	0.143196
NC_008687	Paracoccus_denitrificans_PD1222_uid58187	Proteobacteria	0	0	1730097	0.0187741	0.66824	0.613486	0.0832366	0.113545
NC_009801	Escherichia_coli_E24377A_uid58395	Proteobacteria	0	0	4979619	0.0186872	0.506216	0.55717	0.0279643	0.0840918
NC_010084	Burkholderia_multivorans_ATCC_17616_uid58697	Proteobacteria	0	0	3448466	0.0183914	0.668693	0.580102	0.0521532	0.110267
NC_010804	Burkholderia_multivorans_ATCC_17616_uid58909	Proteobacteria	0	0	3448421	0.0183316	0.66869	0.581064	0.0485277	0.111577
NC_011004	Rhodopseudomonas_palustris_TIE_1_uid58995	Proteobacteria	0	0	5744041	0.0183092	0.648598	0.567423	0.091212	0.19952
NC_012214	Erwinia_pyrifoliae_Ep1_96_uid40659	Proteobacteria	0	0	4026322	0.0181997	0.534216	0.592094	0.026727	0.0793214
NC_010943	Stenotrophomonas_maltophilia_K279a	Proteobacteria	0	0	4851126	0.0181871	0.66324	0.542323	0.0892098	0.118659
NC_009800	Escherichia_coli_HS_uid58393	Proteobacteria	0	0	4643538	0.0181812	0.508196	0.565684	0.0275169	0.0811016
NC_007517	Geobacter_metallireducens_GS_15_uid57731	Proteobacteria	0	0	3997420	0.0181442	0.595095	0.675476	0.154589	0.171228
NC_012967	Escherichia_coli_B_REL606_uid58803	Proteobacteria	0	0	4629812	0.0181312	0.507694	0.557088	0.025718	0.0732015
NC_009254	Burkholderia_vietnamiensis_G4_uid58075	Proteobacteria	0	0	1241007	0.0181022	0.664438	0.626016	0.0498187	0.0846518
NC_010170	Bordetella_petrii	Proteobacteria	0	0	5287950	0.0181008	0.654828	0.541294	0.592506	0.801218
NC_007964	Nitrobacter_hamburgensis_X14_uid58293	Proteobacteria	0	0	4406967	0.0180625	0.617138	0.555614	0.0722976	0.143132
NC_000913	Escherichia_coli_K_12_substr__MG1655_uid57779	Proteobacteria	0.35	1.488	4639675	0.0180618	0.507897	0.54971	0.0256686	0.0756467
NC_009483	Geobacter_uraniireducens_Rf4_uid58475	Proteobacteria	0	0	5136364	0.0180423	0.542382	0.673868	0.0641125	0.0861333
NC_010468	Escherichia_coli_ATCC_8739_uid58783	Proteobacteria	0	0	4746218	0.0180396	0.508665	0.559464	0.023641	0.0713026
NC_010473	Escherichia_coli_K_12_substr__DH10B_uid58979	Proteobacteria	0	1.488	4686137	0.0180155	0.507813	0.548848	0.0247587	0.0750145
NC_006834	Xanthomonas_oryzae_KACC10331_uid58155	Proteobacteria	2	0	4941439	0.0180152	0.636933	0.548117	0.0696587	0.0902657
NC_009937	Azorhizobium_caulinodans_ORS_571_uid58905	Proteobacteria	0	0	5369772	0.0180138	0.67319	0.526506	-0.150135	-0.215351
NC_012759	Escherichia_coli_BW2952_uid59391	Proteobacteria	0	0	4578159	0.0179314	0.507907	0.55327	0.0240617	0.0739803
AC_000091	Escherichia_coli_K_12_substr__W3110_uid58567	Proteobacteria	0	1.488	4646332	0.0179242	0.507996	0.555266	0.0248562	0.0745563
NC_007952	Burkholderia_xenovorans_LB400_uid57823	Proteobacteria	0	0	3363523	0.0179143	0.628355	0.571815	0.0445161	0.086115
NC_010002	Delftia_acidovorans_SPH_1_uid58703	Proteobacteria	0	0	6767514	0.0178532	0.664763	0.521192	-2.12457	-2.86599
NC_012947	Escherichia_coli__BL21_Gold_DE3_pLysS_AG__uid59245	Proteobacteria	0	0	4570938	0.0177648	0.508405	0.551218	0.0273652	0.0750075
NC_006933	Brucella_abortus_bv__1_9_941_uid58019	Proteobacteria	2	0	2124241	0.0177127	0.313691	0.559772	0.045859	0.103806
NC_010498	Escherichia_coli_SMS_3_5_uid58919	Proteobacteria	0	0	5068389	0.0176859	0.504967	0.563054	0.0286967	0.0780433
NC_006513	Aromatoleum_aromaticum_EbN1_uid58231	Proteobacteria	4.3	0	4296230	0.0175857	0.651215	0.557632	0.122554	0.149962
NC_011740	Escherichia_fergusonii_ATCC_35469_uid59375	Proteobacteria	0	0	4588711	0.0175786	0.499364	0.560535	0.0235804	0.0690723
NC_011983	Agrobacterium_radiobacter_K84_uid58269	Proteobacteria	0	0	2650913	0.017537	0.597617	0.509314	0.178107	0.372543
NC_010717	Xanthomonas_oryzae_PXO99A_uid59131	Proteobacteria	0	0	5240075	0.0174809	0.636341	0.540698	0.074699	0.0953678
NC_007940	Rickettsia_bellii_RML369_C_uid58405	Proteobacteria	0	0	1522076	0.0173658	0.316459	0.558205	0.0225013	0.102997
NC_007705	Xanthomonas_oryzae_MAFF_311018_uid58547	Proteobacteria	0	0	4940217	0.017333	0.637013	0.549989	0.0641888	0.0900733
NC_010512	Burkholderia_cenocepacia_MC0_3_uid58769	Proteobacteria	0	0	1224595	0.0172196	0.662203	0.54416	0.054427	0.0808039
NC_014034	Rhodobacter_capsulatus_SB_1003_uid47509	Proteobacteria	0	0	3738958	0.0171952	0.665619	0.548396	0.0599988	0.0679009
NC_010681	Burkholderia_phytofirmans_PsJN_uid58729	Proteobacteria	0	0	4467537	0.0171775	0.625772	0.582078	0.0556689	0.112585
NC_009719	Parvibaculum_lavamentivorans_DS_1_uid58739	Proteobacteria	0	0	3914745	0.0171758	0.623281	0.497111	0.133373	0.13942
NC_007204	Psychrobacter_arcticus_273_4_uid58021	Proteobacteria	0	0	2650701	0.0169823	0.428002	0.573384	0.0196796	0.0704535
NC_010086	Burkholderia_multivorans_ATCC_17616_uid58697	Proteobacteria	0	0	2472928	0.0169378	0.671318	0.551628	0.0447632	0.0852451
NC_013854	Azospirillum_B510_uid46085	Proteobacteria	0	0	3311395	0.0169291	0.677602	0.531996	0.2066	0.264384
NC_007348	Ralstonia_eutropha_JMP134_uid58047	Proteobacteria	0	0	2726152	0.0169095	0.649835	0.515794	0.0660953	0.114237
NC_007794	Novosphingobium_aromaticivorans_DSM_12444_uid57747	Proteobacteria	0	0	3561584	0.0168863	0.651528	0.565754	0.275881	0.288479
NC_010805	Burkholderia_multivorans_ATCC_17616_uid58909	Proteobacteria	0	0	2473162	0.0168659	0.671328	0.544857	0.0429634	0.0845493
NC_007614	Nitrosospira_multiformis_ATCC_25196_uid58361	Proteobacteria	0	0	3184243	0.0168627	0.539426	0.591222	0.0355566	0.0722725
NC_009436	Enterobacter_638_uid58727	Proteobacteria	0	0	4518712	0.016834	0.529818	0.587749	0.0256175	0.0772669
NC_013971	Erwinia_amylovora_ATCC_49946_uid46943	Proteobacteria	0	0	3805874	0.0167273	0.536002	0.58765	0.027505	0.0794434
NC_013961	Erwinia_amylovora_CFBP1430_uid46839	Proteobacteria	0	0	3805573	0.0167226	0.536019	0.588411	0.0333525	0.0863953
NC_008836	Burkholderia_mallei_NCTC_10229_uid58383	Proteobacteria	0	0	3458208	0.0166468	0.68155	0.539616	0.0708954	0.096642
NC_009883	Rickettsia_bellii_OSU_85_389_uid58681	Proteobacteria	0	0	1528980	0.0166372	0.316282	0.552614	0.0243177	0.110852
NC_008686	Paracoccus_denitrificans_PD1222_uid58187	Proteobacteria	0	0	2852282	0.0166197	0.667064	0.562902	0.0817213	0.121869
NC_009256	Burkholderia_vietnamiensis_G4_uid58075	Proteobacteria	0	0	3652814	0.0165987	0.664862	0.573786	0.0685056	0.125769
NC_011138	Alteromonas_macleodii__Deep_ecotype__uid58251	Proteobacteria	0	0	4412282	0.0164799	0.448787	0.5662	0.0271237	0.0911628
NC_014121	Enterobacter_cloacae_ATCC_13047_uid48363	Proteobacteria	0	0	5314581	0.0164638	0.547867	0.586133	0.0337348	0.0876972
NC_006348	Burkholderia_mallei_ATCC_23344_uid57725	Proteobacteria	0.4	0	3510148	0.0164181	0.681542	0.570331	0.06648	0.0942304
NC_008752	Acidovorax_citrulli_AAC00_1_uid58429	Proteobacteria	0	0	5352772	0.0163272	0.685323	0.547791	1.34451	1.64322
NC_010676	Burkholderia_phytofirmans_PsJN_uid58729	Proteobacteria	0	0	3625999	0.0162275	0.62062	0.553191	0.0485475	0.0942148
NC_010622	Burkholderia_phymatum_STM815_uid58699	Proteobacteria	0	0	3479187	0.0162	0.630264	0.583523	0.047083	0.101755
NC_014313	Hyphomicrobium_denitrificans_ATCC_51888_uid50325	Proteobacteria	0	0	3638969	0.016101	0.608124	0.507977	-0.148058	-0.261963
NC_009255	Burkholderia_vietnamiensis_G4_uid58075	Proteobacteria	0	0	2411759	0.0160667	0.668303	0.561873	0.0607831	0.0891295
NC_012856	Ralstonia_pickettii_12D_uid58859	Proteobacteria	0	0	3647724	0.0160533	0.635583	0.569082	0.112806	0.20855
NC_007969	Psychrobacter_cryohalolentis_K5_uid58373	Proteobacteria	0	0	3059876	0.0160464	0.422913	0.559838	0.0181971	0.0728046
NC_010682	Ralstonia_pickettii_12J_uid58737	Proteobacteria	0	0	3942557	0.0157012	0.634343	0.557474	0.0989009	0.191448
NC_013716	Citrobacter_rodentium_ICC168	Proteobacteria	0	0	5346659	0.0156784	0.547222	0.55074	0.0317807	0.0803284
NC_011916	Caulobacter_crescentus_NA1000_uid59307	Proteobacteria	0	1.152	4042929	0.0156399	0.671716	0.544235	0.3023	0.408219
NC_009428	Rhodobacter_sphaeroides_ATCC_17025_uid58451	Proteobacteria	0	0	3217726	0.0156092	0.684775	0.571199	0.0902271	0.0985974
NC_007958	Rhodopseudomonas_palustris_BisB5_uid58441	Proteobacteria	0	0	4892717	0.0155907	0.648078	0.578708	0.0786316	0.194114
NC_009714	Campylobacter_hominis_ATCC_BAA_381_uid58981	Proteobacteria	0	0	1711273	0.0155031	0.317332	0.567857	0.0156187	0.12285
NC_002696	Caulobacter_crescentus_CB15_uid57891	Proteobacteria	1.5	1.152	4016947	0.0154428	0.67214	0.544433	0.27817	0.377063
NC_011979	Geobacter_FRC_32_uid58543	Proteobacteria	0	0	4304501	0.0153024	0.53472	0.663857	0.0697765	0.107528
NC_007347	Ralstonia_eutropha_JMP134_uid58047	Proteobacteria	0	0	3806533	0.0152871	0.646752	0.58726	0.0726048	0.138458
NC_010623	Burkholderia_phymatum_STM815_uid58699	Proteobacteria	0	0	2697374	0.0151762	0.623282	0.579821	0.0425145	0.0887012
NC_002978	Wolbachia_endosymbiont_of_Drosophila_melanogaster_uid57851	Proteobacteria	0	0	1267782	0.0151319	0.352348	0.544389	0.0337098	0.0939248
NC_013851	Allochromatium_vinosum_DSM_180_uid46083	Proteobacteria	0	0	3526903	0.0150685	0.643726	0.555446	-6.09528	-8.22686
NC_008048	Sphingopyxis_alaskensis_RB2256_uid58351	Proteobacteria	0	0	3345170	0.0150468	0.655015	0.539652	0.102191	0.127773
NC_008554	Syntrophobacter_fumaroxidans_MPOB_uid58177	Proteobacteria	0	0	4990251	0.0149618	0.599487	0.516859	0.0462835	0.0652549
NC_004337	Shigella_flexneri_2a	Proteobacteria	0	0	4607203	0.0148817	0.508894	0.545629	0.0320823	0.0758697
NC_007493	Rhodobacter_sphaeroides_2_4_1_uid57653	Proteobacteria	0	0	3188609	0.0147729	0.690053	0.54386	0.105612	0.127258
NC_009778	Cronobacter_sakazakii_ATCC_BAA_894_uid58145	Proteobacteria	0	0	4368373	0.014732	0.567671	0.590364	0.0404206	0.11355
NC_010087	Burkholderia_multivorans_ATCC_17616_uid58697	Proteobacteria	0	0	919806	0.014614	0.657752	0.602673	0.0591765	0.10902
NC_011963	Rhodobacter_sphaeroides_KD131_uid59277	Proteobacteria	0	0	3152792	0.0146001	0.691761	0.533699	0.120946	0.13179
NC_009636	Sinorhizobium_medicae_WSM419_uid58549	Proteobacteria	0	0	3781904	0.0145905	0.615022	0.576694	0.111383	0.24051
NC_008781	Polaromonas_naphthalenivorans_CJ2_uid58273	Proteobacteria	0	0	4410291	0.01449	0.625251	0.537708	0.229409	0.493116
NC_013282	Cronobacter_turicensis_z3032_uid40821	Proteobacteria	0	0	4384526	0.0144732	0.574174	0.594113	0.0395221	0.109005
NC_010801	Burkholderia_multivorans_ATCC_17616_uid58909	Proteobacteria	0	0	919805	0.0144694	0.657751	0.608639	0.0511054	0.112663
NC_008314	Ralstonia_eutropha_H16	Proteobacteria	0	0	2912490	0.014457	0.667843	0.530748	0.0931379	0.129827
NC_002929	Bordetella_pertussis_Tohama_I_uid57617	Proteobacteria	6	0	4086189	0.0143652	0.677206	0.562063	-0.752099	-0.733968
NC_007384	Shigella_sonnei_Ss046_uid58217	Proteobacteria	0	0	4825265	0.0143472	0.510098	0.557373	0.0235162	0.0738833
NC_014117	Burkholderia_CCGE1002_uid42523	Proteobacteria	0	0	3518940	0.0143248	0.640999	0.581567	0.0518604	0.110174
NC_009511	Sphingomonas_wittichii_RW1_uid58691	Proteobacteria	0	0	5382261	0.0141125	0.683975	0.537843	0.350378	0.373556
NC_014013	Sphingobium_japonicum_UT26S_uid47077	Proteobacteria	0	0	681892	0.0140667	0.659365	0.50937	0.0921029	0.0590184
NC_007482	Pseudoalteromonas_haloplanktis_TAC125_uid58431	Proteobacteria	0	0	635328	0.0140463	0.393672	0.53945	0.0213594	0.10396
NC_004741	Shigella_flexneri_2a_2457T_uid57991	Proteobacteria	0	0	4599354	0.0139311	0.509057	0.553967	0.0332961	0.0790629
NC_009488	Orientia_tsutsugamushi_Boryong	Proteobacteria	0	0	2127051	0.0139099	0.30531	0.585097	0.0365525	0.0963934
NC_008785	Burkholderia_mallei_SAVP1_uid58387	Proteobacteria	0	0	3497479	0.0138646	0.681498	0.535032	0.0824702	0.105825
NC_004344	Wigglesworthia_glossinidia_endosymbiont_of_Glossina_brevipalpis_uid57853	Proteobacteria	0	0.105	697724	0.0137304	0.224789	0.537954	0.0114721	0.126847
NC_012587	Rhizobium_NGR234_uid59081	Proteobacteria	0	0	3925702	0.013567	0.630288	0.57013	0.474485	1.00692
NC_014118	Burkholderia_CCGE1002_uid42523	Proteobacteria	0	0	2593966	0.0135607	0.632299	0.586619	0.0500493	0.100883
NC_009080	Burkholderia_mallei_NCTC_10247_uid58385	Proteobacteria	0	0	3495687	0.0135049	0.681644	0.563703	0.0807635	0.102792
NC_008313	Ralstonia_eutropha_H16	Proteobacteria	0	0	4052032	0.013492	0.664659	0.581644	0.102923	0.162578
NC_014323	Herbaspirillum_seropedicae_SmR1_uid50427	Proteobacteria	0	0	5513887	0.0134876	0.634046	0.569618	-0.316246	-0.495609
NC_012850	Rhizobium_leguminosarum_bv__trifolii_WSM1325_uid58991	Proteobacteria	0	0	4767043	0.0132697	0.610875	0.522578	-0.336412	-0.63331
NC_005810	Yersinia_pestis_biovar_Microtus_91001_uid58037	Proteobacteria	0	0	4595065	0.0132636	0.476501	0.525585	0.0345258	0.090825
NC_003047	Sinorhizobium_meliloti_1021_uid57603	Proteobacteria	1.5	0.637	3654135	0.0132461	0.627289	0.555423	0.265114	0.524329
NC_014100	Caulobacter_segnis_ATCC_21756_uid41709	Proteobacteria	0	0	4655622	0.0131243	0.676669	0.564282	-0.274924	-0.422569
NC_009049	Rhodobacter_sphaeroides_ATCC_17029_uid58449	Proteobacteria	0	0	3147721	0.0129551	0.690928	0.548452	0.120498	0.149712
NC_007761	Rhizobium_etli_CFN_42_uid58377	Proteobacteria	0	0	4381608	0.0129172	0.612722	0.531862	-0.369942	-0.659098
NC_008258	Shigella_flexneri_5_8401_uid58583	Proteobacteria	0	0	4574284	0.0127054	0.509177	0.542426	0.0252011	0.0777863
NC_007778	Rhodopseudomonas_palustris_HaA2_uid58439	Proteobacteria	0	0	5331656	0.0126524	0.660384	0.584027	0.132949	0.286924
NC_010530	Cupriavidus_taiwanensis	Proteobacteria	0	0	2502411	0.012641	0.679081	0.524086	0.109685	0.144711
NC_004463	Bradyrhizobium_japonicum_USDA_110_uid57599	Proteobacteria	20	0.741	9105828	0.0126119	0.640594	0.559283	0.966239	1.62758
NC_009445	Bradyrhizobium_ORS278_uid58941	Proteobacteria	0	0	7456587	0.0124485	0.655104	0.567004	0.509027	0.911547
NC_008825	Methylibium_petroleiphilum_PM1_uid58085	Proteobacteria	0	0	4044195	0.0122845	0.691978	0.561551	0.141217	0.226522
NC_011369	Rhizobium_leguminosarum_bv__trifolii_WSM2304_uid58997	Proteobacteria	0	0	4537948	0.0122729	0.615309	0.475694	-0.239397	-0.468767
NC_010994	Rhizobium_etli_CIAT_652_uid59115	Proteobacteria	0	0	4513324	0.0122229	0.616652	0.524424	-0.270663	-0.494943
NC_013956	Pantoea_ananatis_LMG_20103_uid46807	Proteobacteria	0	0	4690298	0.012195	0.536871	0.580028	0.0288152	0.0889968
NC_008380	Rhizobium_leguminosarum_bv__viciae_3841_uid57955	Proteobacteria	0	0	5057142	0.0121606	0.610904	0.521841	-0.314021	-0.571345
NC_007760	Anaeromyxobacter_dehalogenans_2CP_C_uid58135	Proteobacteria	0	0	5013479	0.0119496	0.749053	0.575604	0.106795	0.0945007
NC_010162	Sorangium_cellulosum__So_ce_56_	Proteobacteria	0	0	13033779	0.0119019	0.713757	0.510289	0.162931	0.103302
NC_010524	Leptothrix_cholodnii_SP_6_uid58971	Proteobacteria	0	0	4909403	0.0118994	0.688997	0.524639	-0.206335	-0.315184
NC_010528	Cupriavidus_taiwanensis	Proteobacteria	0	0	3416911	0.0117419	0.675116	0.5903	0.130391	0.237617
NC_011145	Anaeromyxobacter_K_uid58953	Proteobacteria	0	0	5013479	0.011732	0.755595	0.571655	0.10817	0.0951736
NC_011891	Anaeromyxobacter_dehalogenans_2CP_1_uid58989	Proteobacteria	0	0	5029329	0.0117302	0.747165	0.569991	0.110958	0.0959534
NC_007404	Thiobacillus_denitrificans_ATCC_25259_uid58189	Proteobacteria	0	0	2909809	0.0115482	0.660672	0.587757	-0.210162	-0.387783
NC_010658	Shigella_boydii_CDC_3083_94_uid58415	Proteobacteria	0	0	4615997	0.0114565	0.513327	0.549458	0.0358352	0.0864243
NC_009675	Anaeromyxobacter_Fw109_5_uid58755	Proteobacteria	0	0	5013479	0.0112166	0.774109	0.577405	0.211859	0.218889
NC_011769	Desulfovibrio_vulgaris__Miyazaki_F__uid59089	Proteobacteria	0	0	4040304	0.0111318	0.67109	0.497168	-1.10201	-1.04575
NC_010981	Wolbachia_endosymbiont_of_Culex_quinquefasciatus_Pel	Proteobacteria	0	0	1482455	0.0111012	0.341902	0.545098	0.0232666	0.0830774
NC_012918	Geobacter_M21_uid59037	Proteobacteria	0	0	4745806	0.0109516	0.6047	0.671653	0.156328	0.171424
NC_008254	Chelativorans_BNC1_uid58069	Proteobacteria	0	0	4412446	0.0108507	0.610668	0.54984	0.0740086	0.14355
NC_007925	Rhodopseudomonas_palustris_BisB18_uid58443	Proteobacteria	0	0	5513844	0.0107123	0.649572	0.602333	0.110928	0.222294
NC_012796	Desulfovibrio_magneticus_RS_1_uid59309	Proteobacteria	0	0	5248049	0.0106758	0.627694	0.491349	-0.16455	-0.153237
NC_014217	Starkeya_novella_DSM_506_uid48815	Proteobacteria	0	0	4765023	0.0106612	0.678847	0.51377	-0.135058	-0.199439
NC_009484	Acidiphilium_cryptum_JF_5_uid58447	Proteobacteria	0	0	3389227	0.0101342	0.679927	0.525147	-3.48551	-1.59635
NC_010338	Caulobacter_K31_uid58551	Proteobacteria	0	0	5477872	0.00997468	0.674633	0.543568	-0.193146	-0.230128
NC_011666	Methylocella_silvestris_BL2_uid59433	Proteobacteria	0	0	4305430	0.00983781	0.630834	0.514151	0.492443	1.17668
NC_010159	Yersinia_pestis_Angola_uid58485	Proteobacteria	0	0	4504254	0.00978719	0.47598	0.512399	0.0413132	0.102547
NC_011146	Geobacter_bemidjiensis_Bem_uid58749	Proteobacteria	0	0	4615150	0.00969459	0.602667	0.627982	0.171974	0.191396
NC_010125	Gluconacetobacter_diazotrophicus_PAl_5_FAPERJ	Proteobacteria	0	0	3944163	0.00954093	0.664311	0.515352	0.131864	0.137736
NC_008435	Rhodopseudomonas_palustris_BisA53_uid58445	Proteobacteria	0	0	5505494	0.00949561	0.644427	0.590732	0.105036	0.207405
NC_007722	Erythrobacter_litoralis_HTCC2594_uid58299	Proteobacteria	0	0	3052398	0.00949548	0.630685	0.523588	0.0870717	0.141284
NC_011144	Phenylobacterium_zucineum_HLK1_uid58959	Proteobacteria	0	0	3996255	0.00921538	0.713464	0.568472	2.57959	2.97648
NC_011852	Haemophilus_parasuis_SH0165_uid59273	Proteobacteria	0	0	2269156	0.0092043	0.399931	0.557426	0.0379921	0.117338
NC_002678	Mesorhizobium_loti_MAFF303099_uid57601	Proteobacteria	0	0.757	7036071	0.00869846	0.627471	0.538861	0.426181	0.77693
NC_010793	Orientia_tsutsugamushi_Ikeda_uid58869	Proteobacteria	0	0	2008987	0.00863669	0.305138	0.517803	0.0381124	0.118896
NC_014006	Sphingobium_japonicum_UT26S_uid47077	Proteobacteria	0	0	3514822	0.00861665	0.647584	0.544785	0.140547	0.0930212
NC_007494	Rhodobacter_sphaeroides_2_4_1_uid57653	Proteobacteria	0	0	943016	0.00860219	0.690114	0.509592	0.25653	0.323585
NC_007606	Shigella_dysenteriae_Sd197_uid58213	Proteobacteria	0	0	4369232	0.00853651	0.512497	0.532209	0.045164	0.0964111
NC_007613	Shigella_boydii_Sb227_uid58215	Proteobacteria	0	0	4519823	0.00852976	0.512128	0.531333	0.0283071	0.0764942
NC_011958	Rhodobacter_sphaeroides_KD131_uid59277	Proteobacteria	0	0	1297647	0.00852235	0.687063	0.506536	0.21268	0.232455
NC_012730	Rickettsia_peacockii_Rustic_uid59301	Proteobacteria	0	0	1288492	0.00841604	0.325611	0.545356	0.0205004	0.0963431
NC_014119	Burkholderia_CCGE1002_uid42523	Proteobacteria	0	0	1282816	0.00831452	0.626176	0.528881	0.05902	0.117915
NC_008789	Halorhodospira_halophila_SL1_uid58473	Proteobacteria	0	0	2678452	0.00821221	0.679817	0.492934	0.480303	0.399206
NC_009050	Rhodobacter_sphaeroides_ATCC_17029_uid58449	Proteobacteria	0	0	1219053	0.00818914	0.686283	0.488107	0.243327	0.33522
NC_011420	Rhodospirillum_centenum_SW_uid58805	Proteobacteria	0	0	4355548	0.00619968	0.704612	0.534233	0.388777	0.487183
NC_012791	Variovorax_paradoxus_S110_uid59437	Proteobacteria	0	0	5626353	0.00585548	0.676339	0.558206	-0.18562	-0.339746
NC_011768	Desulfatibacillum_alkenivorans_AK_01_uid58913	Proteobacteria	0	0	6517073	0.00537588	0.544846	0.533333	0.0761681	0.149908
NC_008786	Verminephrobacter_eiseniae_EF01_2_uid58675	Proteobacteria	0	0	5566749	0.00489927	0.652791	0.499898	5.19099	8.44716
NC_009720	Xanthobacter_autotrophicus_Py2_uid58453	Proteobacteria	0	0	5308934	0.00488497	0.674647	0.522335	-0.0968288	-0.126354
NC_012751	Candidatus_Hamiltonella_defensa_5AT__Acyrthosiphon_pisum__uid59289	Proteobacteria	0	0	2110331	0.00325494	0.403232	0.526316	0.0607413	0.223893
NC_012808	Methylobacterium_extorquens_AM1_uid57605	Proteobacteria	0	0	5511322	0.00320068	0.687096	0.486672	-0.0767573	-0.0951068
NC_012988	Methylobacterium_extorquens_DM4	Proteobacteria	0	0	5943768	0.00289412	0.680879	0.494189	-0.0926855	-0.111633
NC_010172	Methylobacterium_extorquens_PA1_uid58821	Proteobacteria	0	0	5471154	0.00287289	0.681839	0.494098	-0.0699885	-0.0901423
NC_011757	Methylobacterium_chloromethanicum_CM4_uid58933	Proteobacteria	0	0	5777908	0.00263971	0.682104	0.491781	-0.0807032	-0.103615
NC_010725	Methylobacterium_populi_BJ001_uid58937	Proteobacteria	0	0	5800441	0.00249791	0.693901	0.492647	-0.0722243	-0.086133
NC_007984	Baumannia_cicadellinicola_Hc__Homalodisca_coagulata__uid58111	Proteobacteria	0	0	686194	0.00181727	0.332348	0.548822	0.0275417	0.096801
NC_010511	Methylobacterium_4_46_uid58843	Proteobacteria	0	0	7659055	0.0013499	0.715831	0.489407	-0.115381	-0.107793
NC_010505	Methylobacterium_radiotolerans_JCM_2831_uid58845	Proteobacteria	0	0	6077833	0.000809335	0.715021	0.512135	-0.0639203	-0.0819146
NC_011894	Methylobacterium_nodulans_ORS_2060_uid59023	Proteobacteria	0	0	7772460	0.000576394	0.688572	0.494015	-0.13922	-0.139569
NC_011244	Borrelia_recurrentis_A1_uid58793	Spirochaetes	0	0	930981	0.144021	0.275182	0.66375	0.00628922	0.0551626
NC_011229	Borrelia_duttonii_Ly_uid58791	Spirochaetes	0	0	931674	0.143387	0.27586	0.667073	0.00658278	0.0564525
NC_010673	Borrelia_hermsii_DAH_uid59225	Spirochaetes	0	0	922307	0.138849	0.298277	0.665037	0.00732	0.0520294
NC_008277	Borrelia_afzelii_PKo_uid58653	Spirochaetes	0	0	905394	0.119029	0.283111	0.663529	0.00958772	0.0769172
NC_011728	Borrelia_burgdorferi_ZS7_uid59429	Spirochaetes	0	-0.308	906707	0.118089	0.285406	0.664188	0.00907098	0.074688
NC_001318	Borrelia_burgdorferi_B31_uid57581	Spirochaetes	4	-0.308	910724	0.117808	0.285933	0.664706	0.00969185	0.0860058
NC_006156	Borrelia_garinii_PBi_uid58125	Spirochaetes	0	0	904246	0.114712	0.283048	0.669481	0.00934817	0.0677829
NC_010741	Treponema_pallidum_SS14_uid58977	Spirochaetes	0	-0.015	1139457	0.0878927	0.527603	0.659202	0.0283243	0.0393129
NC_000919	Treponema_pallidum_Nichols_uid57585	Spirochaetes	33	-0.015	1138011	0.0878744	0.527721	0.659245	0.0280564	0.0391972
NC_008509	Leptospira_borgpetersenii_serovar_Hardjo_bovis_L550_uid58507	Spirochaetes	0	0	317336	0.037985	0.401634	0.566116	0.0198981	0.138832
NC_008511	Leptospira_borgpetersenii_serovar_Hardjo_bovis_JB197_uid58509	Spirochaetes	0	0	299762	0.0370694	0.404281	0.582979	0.0201329	0.137449
NC_005823	Leptospira_interrogans_serovar_Copenhageni_Fiocruz_L1_130_uid58065	Spirochaetes	0	0	4277185	0.0346786	0.350495	0.574875	0.0184754	0.108227
NC_004342	Leptospira_interrogans_serovar_Lai_56601_uid57881	Spirochaetes	9	0.67	4332241	0.0339741	0.350678	0.574618	0.0183021	0.110925
NC_010842	Leptospira_biflexa_serovar_Patoc__Patoc_1__Ames__uid58511	Spirochaetes	0	0	1806582	0.0311212	0.775852	0.556032	0.0473686	0.26995
NC_005824	Leptospira_interrogans_serovar_Copenhageni_Fiocruz_L1_130_uid58065	Spirochaetes	0	0	350181	0.0285995	0.349811	0.544776	0.0170406	0.131405
NC_008510	Leptospira_borgpetersenii_serovar_Hardjo_bovis_JB197_uid58509	Spirochaetes	0	0	3576473	0.0279602	0.402286	0.56997	0.0220082	0.124413
NC_008508	Leptospira_borgpetersenii_serovar_Hardjo_bovis_L550_uid58507	Spirochaetes	0	0	3614446	0.0273375	0.402349	0.568468	0.0223354	0.13168
NC_004343	Leptospira_interrogans_serovar_Lai_56601_uid57881	Spirochaetes	9	0.67	358943	0.0268455	0.351853	0.544828	0.0164082	0.128694
NC_014150	Brachyspira_murdochii_DSM_12563_uid48819	Spirochaetes	0	0	3241804	0.0260269	0.277514	0.567712	0.0122388	0.0731208
NC_012225	Brachyspira_hyodysenteriae_WA1_uid59291	Spirochaetes	0	0	3000694	0.0256461	0.270627	0.569732	0.0108998	0.0684208
NC_010843	Leptospira_biflexa_serovar_Patoc__Patoc_1__Paris__uid58993	Spirochaetes	0	0	277655	0.0224991	0.392732	0.538182	0.052899	0.276534
NC_010845	Leptospira_biflexa_serovar_Patoc__Patoc_1__Ames__uid58511	Spirochaetes	0	0	277995	0.0224213	0.392734	0.535849	0.0540331	0.284904
NC_002967	Treponema_denticola_ATCC_35405_uid57583	Spirochaetes	5	0	2843201	0.0222394	0.378738	0.595445	0.0250704	0.130474
NC_010602	Leptospira_biflexa_serovar_Patoc__Patoc_1__Paris__uid58993	Spirochaetes	0	0	3599677	0.015595	0.388948	0.545428	0.0468094	0.243424
NC_013522	Thermanaerovibrio_acidaminovorans_DSM_6589	Synergistetes	0	0	1848474	0.0566089	0.637926	0.744387	0.027587	0.0287331
NC_014011	Aminobacterium_colombiense_DSM_12261_uid47083	Synergistetes	0	0	1980592	0.0392055	0.453069	0.755733	0.019226	0.0720037
NC_006055	Mesoplasma_florum_L1_uid58055	Tenericutes	0	0	793224	0.11128	0.270205	0.897059	0.0100108	0.0720141
NC_010163	Acholeplasma_laidlawii_PG_8A_uid58901	Tenericutes	0	0	1496992	0.0768875	0.319278	0.871739	0.0171675	0.0887881
NC_004432	Mycoplasma_penetrans_HF_2_uid57729	Tenericutes	0	0.496	1358633	0.0567666	0.257175	0.819324	0.0179983	0.1149
NC_004829	Mycoplasma_gallisepticum_R_low__uid57993	Tenericutes	1	0.498	996422	0.0473093	0.319871	0.789826	0.0369884	0.214825
NC_007633	Mycoplasma_capricolum_ATCC_27343_uid58525	Tenericutes	0	0	1010023	0.040911	0.237704	0.727497	0.0159831	0.117457
NC_011374	Ureaplasma_urealyticum_serovar_10_ATCC_33699_uid59011	Tenericutes	0	0.401	874478	0.0399827	0.257742	0.683721	0.0201391	0.143326
NC_000908	Mycoplasma_genitalium_G37_uid57707	Tenericutes	12	0.318	580076	0.0361022	0.316891	0.810127	0.0341492	0.18395
NC_010503	Ureaplasma_parvum_serovar_3_ATCC_27815_uid58887	Tenericutes	0	0	751679	0.0356788	0.254965	0.694079	0.019349	0.132253
NC_002162	Ureaplasma_parvum_serovar_3_ATCC_700970_uid57711	Tenericutes	0.9	0	751719	0.035504	0.254997	0.687908	0.017264	0.128369
NC_013948	Mycoplasma_agalactiae_uid46679	Tenericutes	0	0	1006702	0.0341094	0.296241	0.631319	0.0195643	0.124218
NC_009497	Mycoplasma_agalactiae_PG2	Tenericutes	0	0	877438	0.0336092	0.297071	0.608108	0.0176275	0.109137
NC_013511	Mycoplasma_hominis	Tenericutes	0	0	665445	0.0318749	0.271182	0.654511	0.0183706	0.101591
NC_005364	Mycoplasma_mycoides_SC_PG1_uid58031	Tenericutes	0	0	1211703	0.0298877	0.239656	0.636453	0.0175983	0.132871
NC_011047	Candidatus_Phytoplasma_mali_uid59087	Tenericutes	0	0	601943	0.0273564	0.213937	0.828452	0.0267206	0.227026
NC_000912	Mycoplasma_pneumoniae_M129_uid57709	Tenericutes	6	0.324	816394	0.0267273	0.40008	0.793605	0.0680483	0.387167
NC_002771	Mycoplasma_pulmonis	Tenericutes	2	0.38	963879	0.0243672	0.266365	0.618438	0.0329941	0.249989
NC_006908	Mycoplasma_mobile_163K_uid58077	Tenericutes	0	0	777079	0.023587	0.249513	0.633914	0.021156	0.156749
NC_012806	Mycoplasma_conjunctivae_HRC_581_uid59325	Tenericutes	0	0	846214	0.0230545	0.284902	0.678726	0.0466969	0.339948
NC_014014	Mycoplasma_crocodyli_MP145_uid47087	Tenericutes	0	0	934379	0.0211039	0.269537	0.585756	0.0200627	0.116399
NC_011025	Mycoplasma_arthritidis_158L3_1_uid58005	Tenericutes	0	0	820453	0.0135693	0.307095	0.612698	0.0520536	0.392218
NC_010544	Candidatus_Phytoplasma_australiense	Tenericutes	0	0	879959	0.0127222	0.274247	0.543192	-0.840857	-5.52101
NC_007716	Aster_yellows_witches_broom_phytoplasma_AYWB_uid58297	Tenericutes	0	0	706569	0.00873092	0.268863	0.659193	-0.234348	-1.09144
NC_005303	Onion_yellows_phytoplasma_OY_M_uid58015	Tenericutes	0	0	853092	0.00837073	0.277598	0.41255	-0.137275	-0.510381
NC_007332	Mycoplasma_hyopneumoniae_7448_uid58039	Tenericutes	0	0	920079	0.00815691	0.284889	0.526718	0.0331532	0.323687
NC_007295	Mycoplasma_hyopneumoniae_J_uid58059	Tenericutes	0	0	897405	0.00801979	0.285222	0.522137	0.0330737	0.317709
NC_007294	Mycoplasma_synoviae_53_uid58061	Tenericutes	0	0	799476	0.00690953	0.284952	0.508371	0.0317677	0.23093
NC_006360	Mycoplasma_hyopneumoniae_232_uid58205	Tenericutes	0	0	892758	0.0035844	0.285612	0.528302	0.0398112	0.367831
NC_009828	Thermotoga_lettingae_TMO_uid58419	Thermotogae	0	0	2135342	0.0252793	0.38697	0.568695	0.0153442	0.0651678
NC_011978	Thermotoga_neapolitana_DSM_4359_uid59065	Thermotogae	0	0	1884562	0.0195897	0.469424	0.569731	0.0282913	0.0795813
NC_000853	Thermotoga_maritima_MSB8_uid57723	Thermotogae	1.2	0.365	1860725	0.0193672	0.462477	0.572276	0.0281708	0.0868916
NC_009486	Thermotoga_petrophila_RKU_1_uid58655	Thermotogae	0	0	1823511	0.017582	0.461012	0.558857	0.0255443	0.0800749
NC_010003	Petrotoga_mobilis_SJ95_uid58747	Thermotogae	0	0	2169548	0.0158429	0.341232	0.546125	0.0170262	0.0997681
NC_009718	Fervidobacterium_nodosum_Rt17_B1_uid58625	Thermotogae	0	0	1948941	0.0156131	0.349893	0.551172	0.0207854	0.087453
NC_011653	Thermosipho_africanus_TCF52B_uid59095	Thermotogae	0	0	2016657	0.0149718	0.308108	0.549411	0.0278881	0.0977198
NC_009616	Thermosipho_melanesiensis_BI429_uid58683	Thermotogae	0	0	1915238	0.0137153	0.313999	0.533014	0.025302	0.0795708
NC_010483	Thermotoga_RQ2_uid58935	Thermotogae	0	0	1877693	0.0131177	0.461777	0.531903	0.0244431	0.0778952
NC_013642	Thermotoga_naphthophila_RKU_10	Thermotogae	0	0	1809823	0.0128493	0.461408	0.562783	0.026539	0.0857905
NC_012785	Kosmotoga_olearia_TBF_19_5_1_uid59205	Thermotogae	0	0	2302126	0.010241	0.41546	0.475673	0.0272154	0.0819553
NC_010794	Methylacidiphilum_infernorum_V4_uid59161	Verrucomicrobia	0	0	2287145	0.035414	0.454828	0.552003	0.0485173	0.129008
NC_010571	Opitutus_terrae_PB90_1_uid58965	Verrucomicrobia	0	0	5957605	0.0280322	0.653411	0.469861	0.0958687	0.0720091
NC_014008	Coraliomargarita_akajimensis_DSM_45221_uid47079	Verrucomicrobia	0	0	3750771	0.0253092	0.536018	0.520526	0.137259	0.122113
